# Supplementary material for: Lubiprostone improves intestinal permeability in humans, a novel therapy for the leaky gut: A prospective randomized pilot study in healthy volunteers
Source: PubMed Central journal article supplement (PMC5391961; doi:10.1371/journal.pone.0175626), 2017-04-14
Supplement: pone.0175626.s003.pdf [file pone.0175626.s003.pdf]

# Replace with Main Title

Your Name

2017-02-28

```
> #####Calculate sample size for comparison between two means#####  
> quartz(width=7, height=7); par(lwd=1, las=1, family="sans", cex=1, mgp=  
> SampleMean(0.01205, 0.00323, 0.05, 0.80, 2, 1)
```

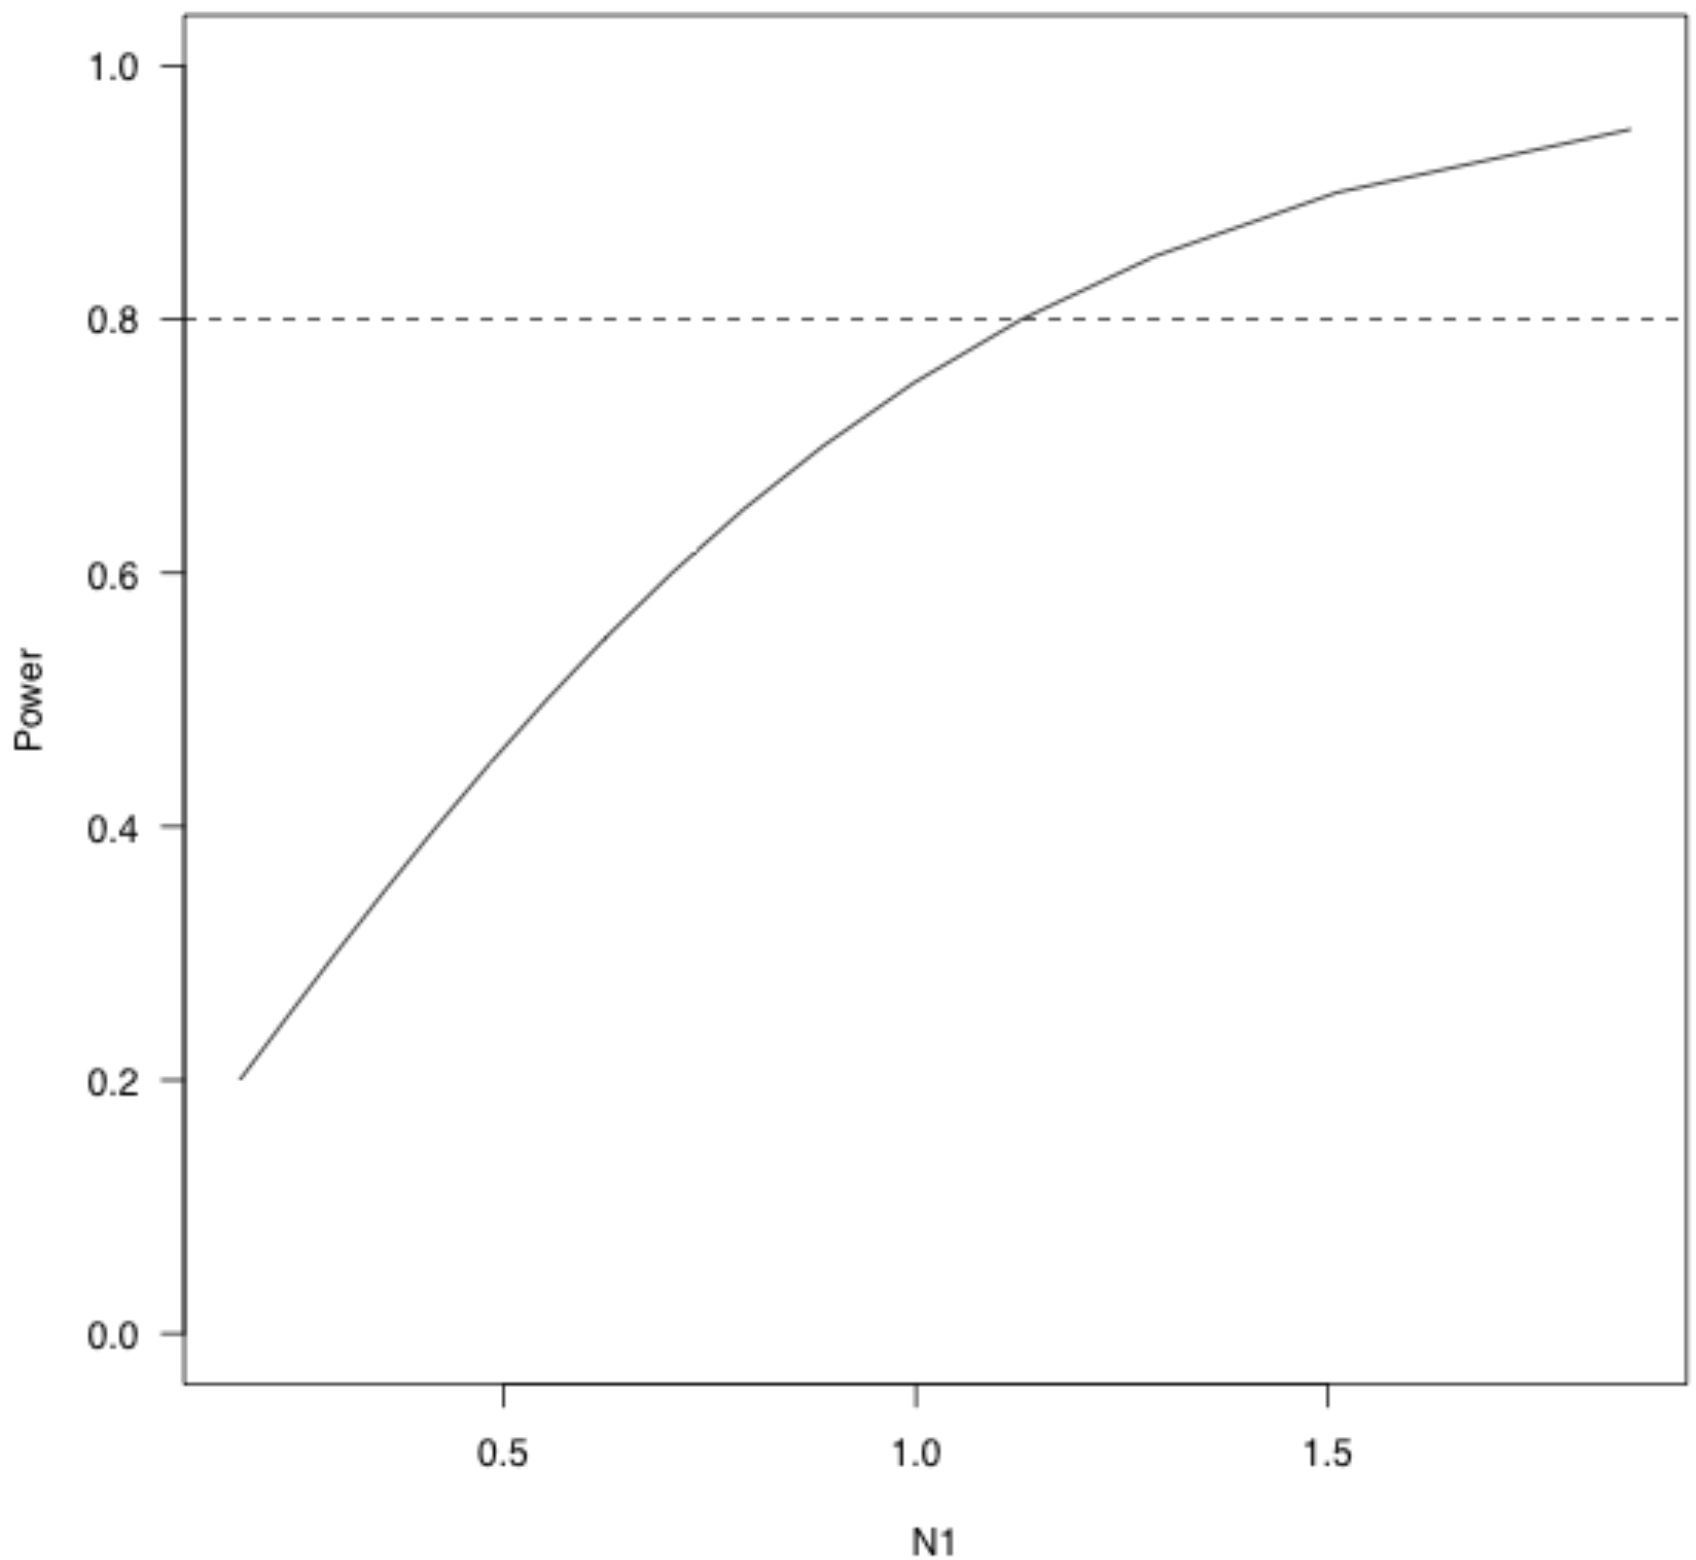

|                      | Assumptions |
|----------------------|-------------|
| Difference in means  | 0.01205     |
| Standard deviation   | 0.00323     |
| Alpha                | 0.05        |
|                      | two-sided   |
| Power                | 0.8         |
| N2/N1                | 1           |
| Required sample size | Estimated   |
| N1                   | 2           |
| N2                   | 2           |

```
> #####Calculate sample size for comparison between two means#####  
> quartz(width=7, height=7); par(lwd=1, las=1, family="sans", cex=1, mgp=  
> SampleMean(0.01205, 0.01074, 0.05, 0.90, 2, 1)
```

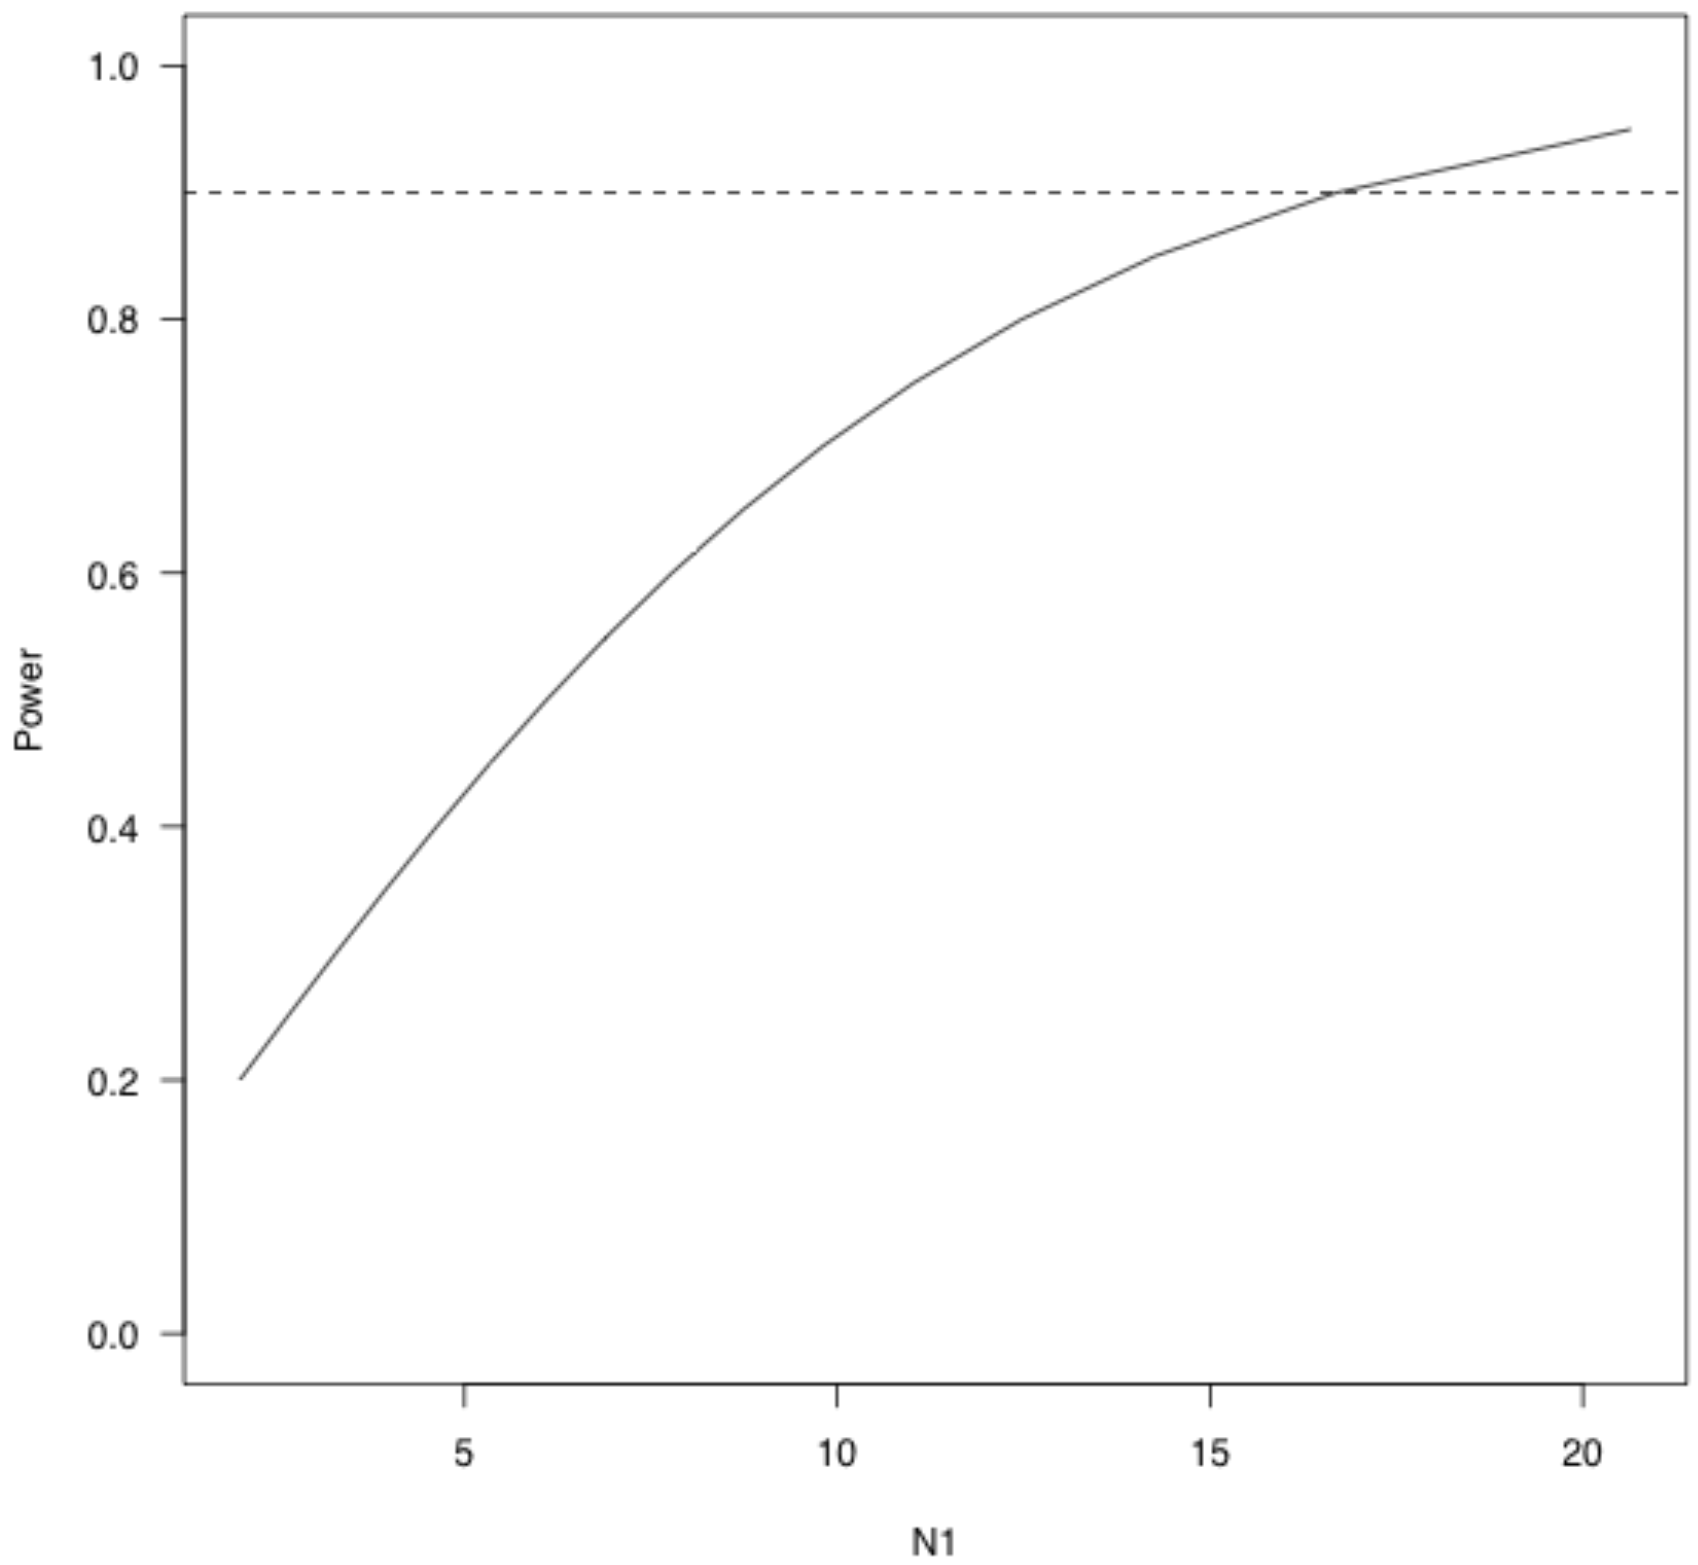

| Assumptions          |           |
|----------------------|-----------|
| Difference in means  | 0.01205   |
| Standard deviation   | 0.01074   |
| Alpha                | 0.05      |
|                      | two-sided |
| Power                | 0.9       |
| N2/N1                | 1         |
| Required sample size |           |
|                      | Estimated |
| N1                   | 17        |
| N2                   | 17        |

```
> #####Calculate sample size for comparison between two means#####  
> quartz(width=7, height=7); par(lwd=1, las=1, family="sans", cex=1, mgp=  
> SampleMean(0.00298, 0.01652, 0.05, 0.90, 2, 1)
```

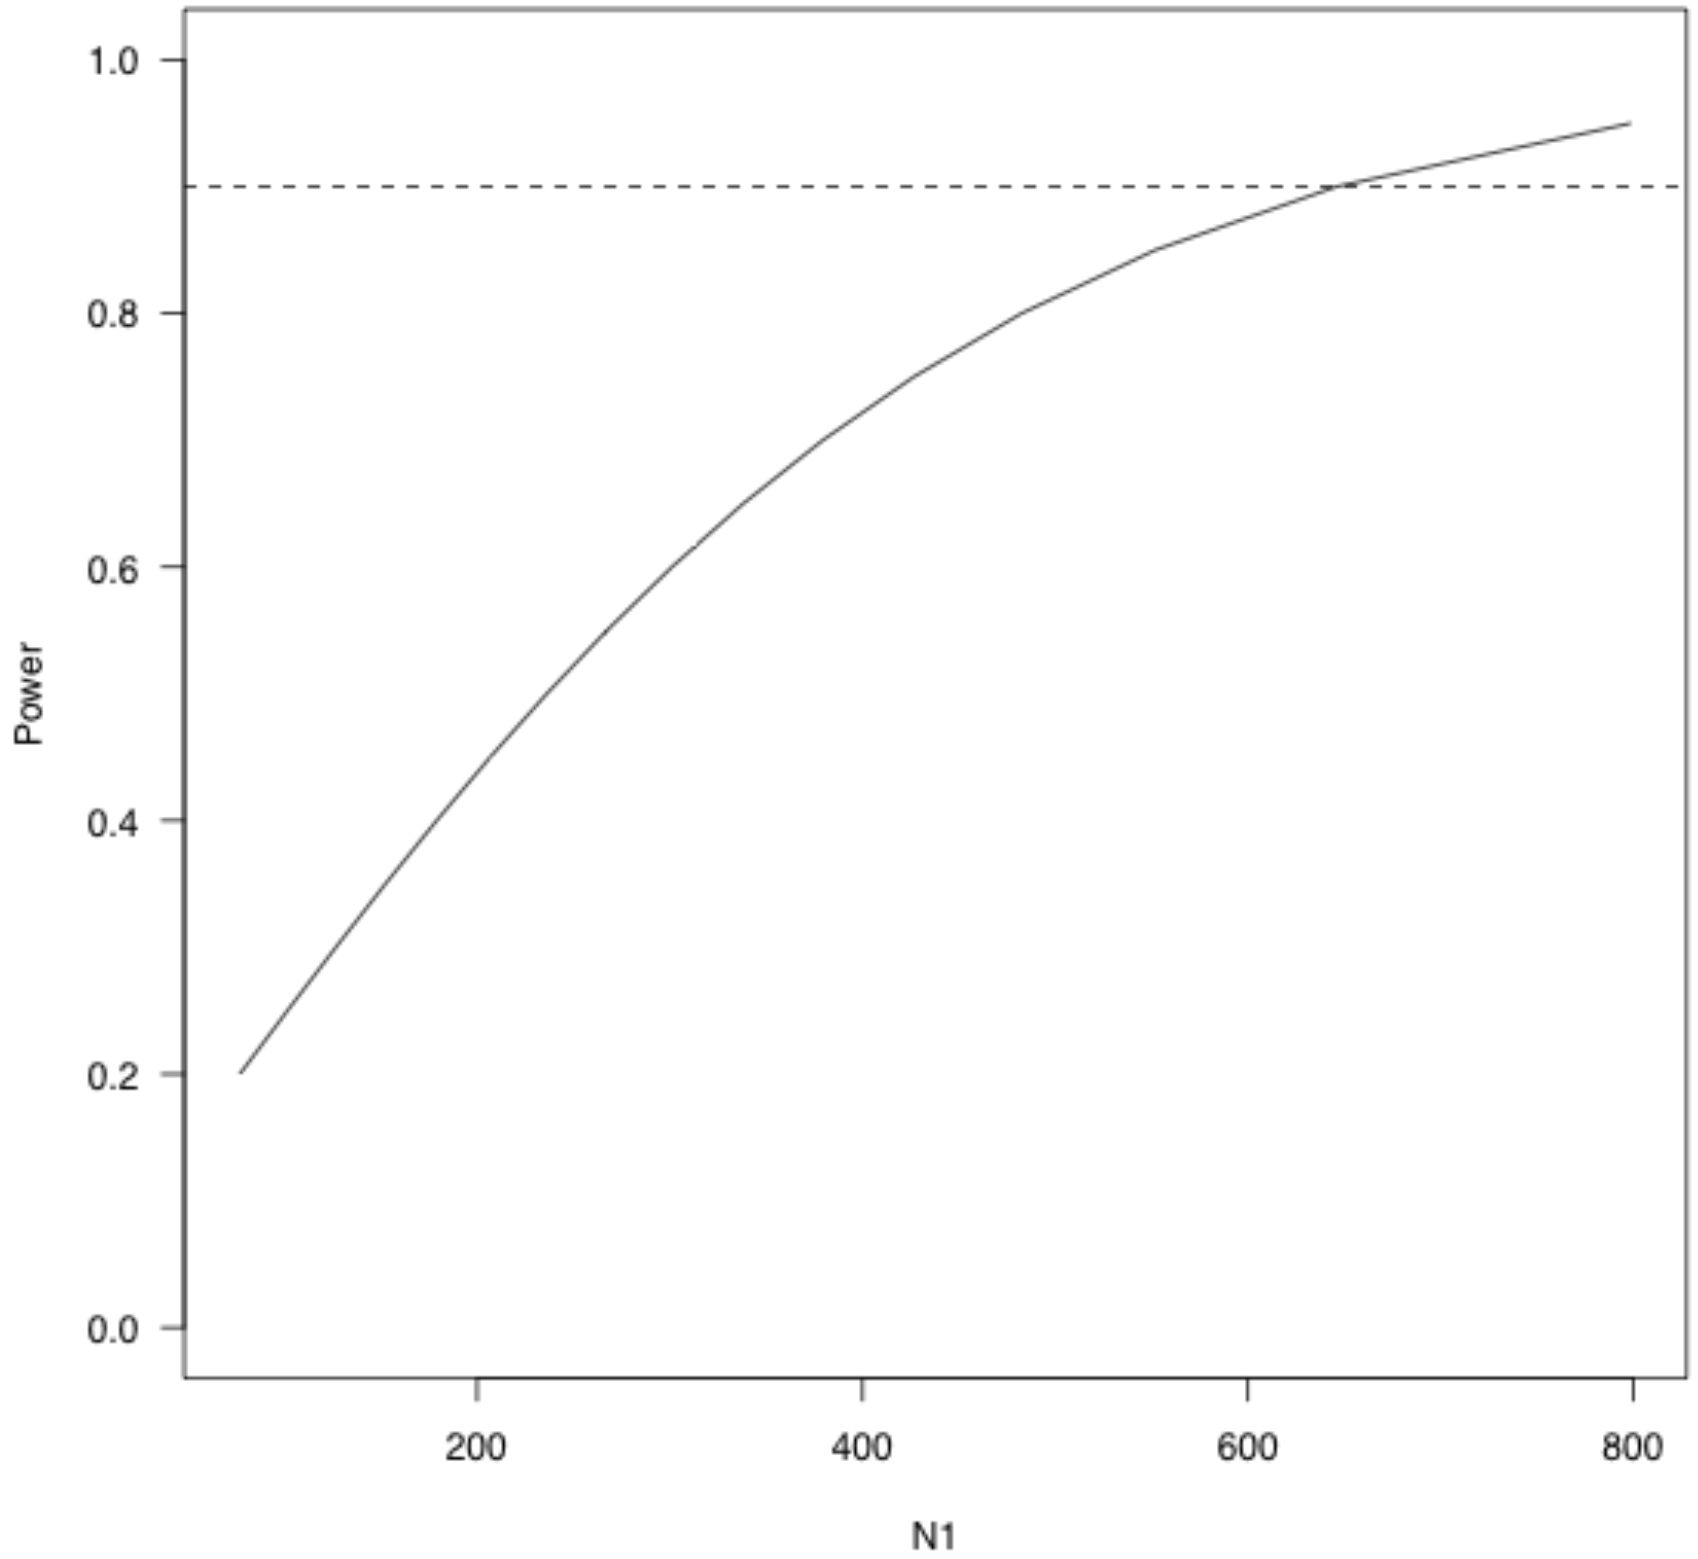

### Assumptions

|                     |           |
|---------------------|-----------|
| Difference in means | 0.00298   |
| Standard deviation  | 0.01652   |
| Alpha               | 0.05      |
|                     | two-sided |
| Power               | 0.9       |
| N2/N1               | 1         |

|                      |           |
|----------------------|-----------|
| Required sample size | Estimated |
| N1                   | 646       |
| N2                   | 646       |

```
> #####Calculate sample size for comparison between two means#####  
> quartz(width=7, height=7); par(lwd=1, las=1, family="sans", cex=1, mgp=  
> SampleMean(0.00298, 0.01240, 0.05, 0.80, 2, 1)
```

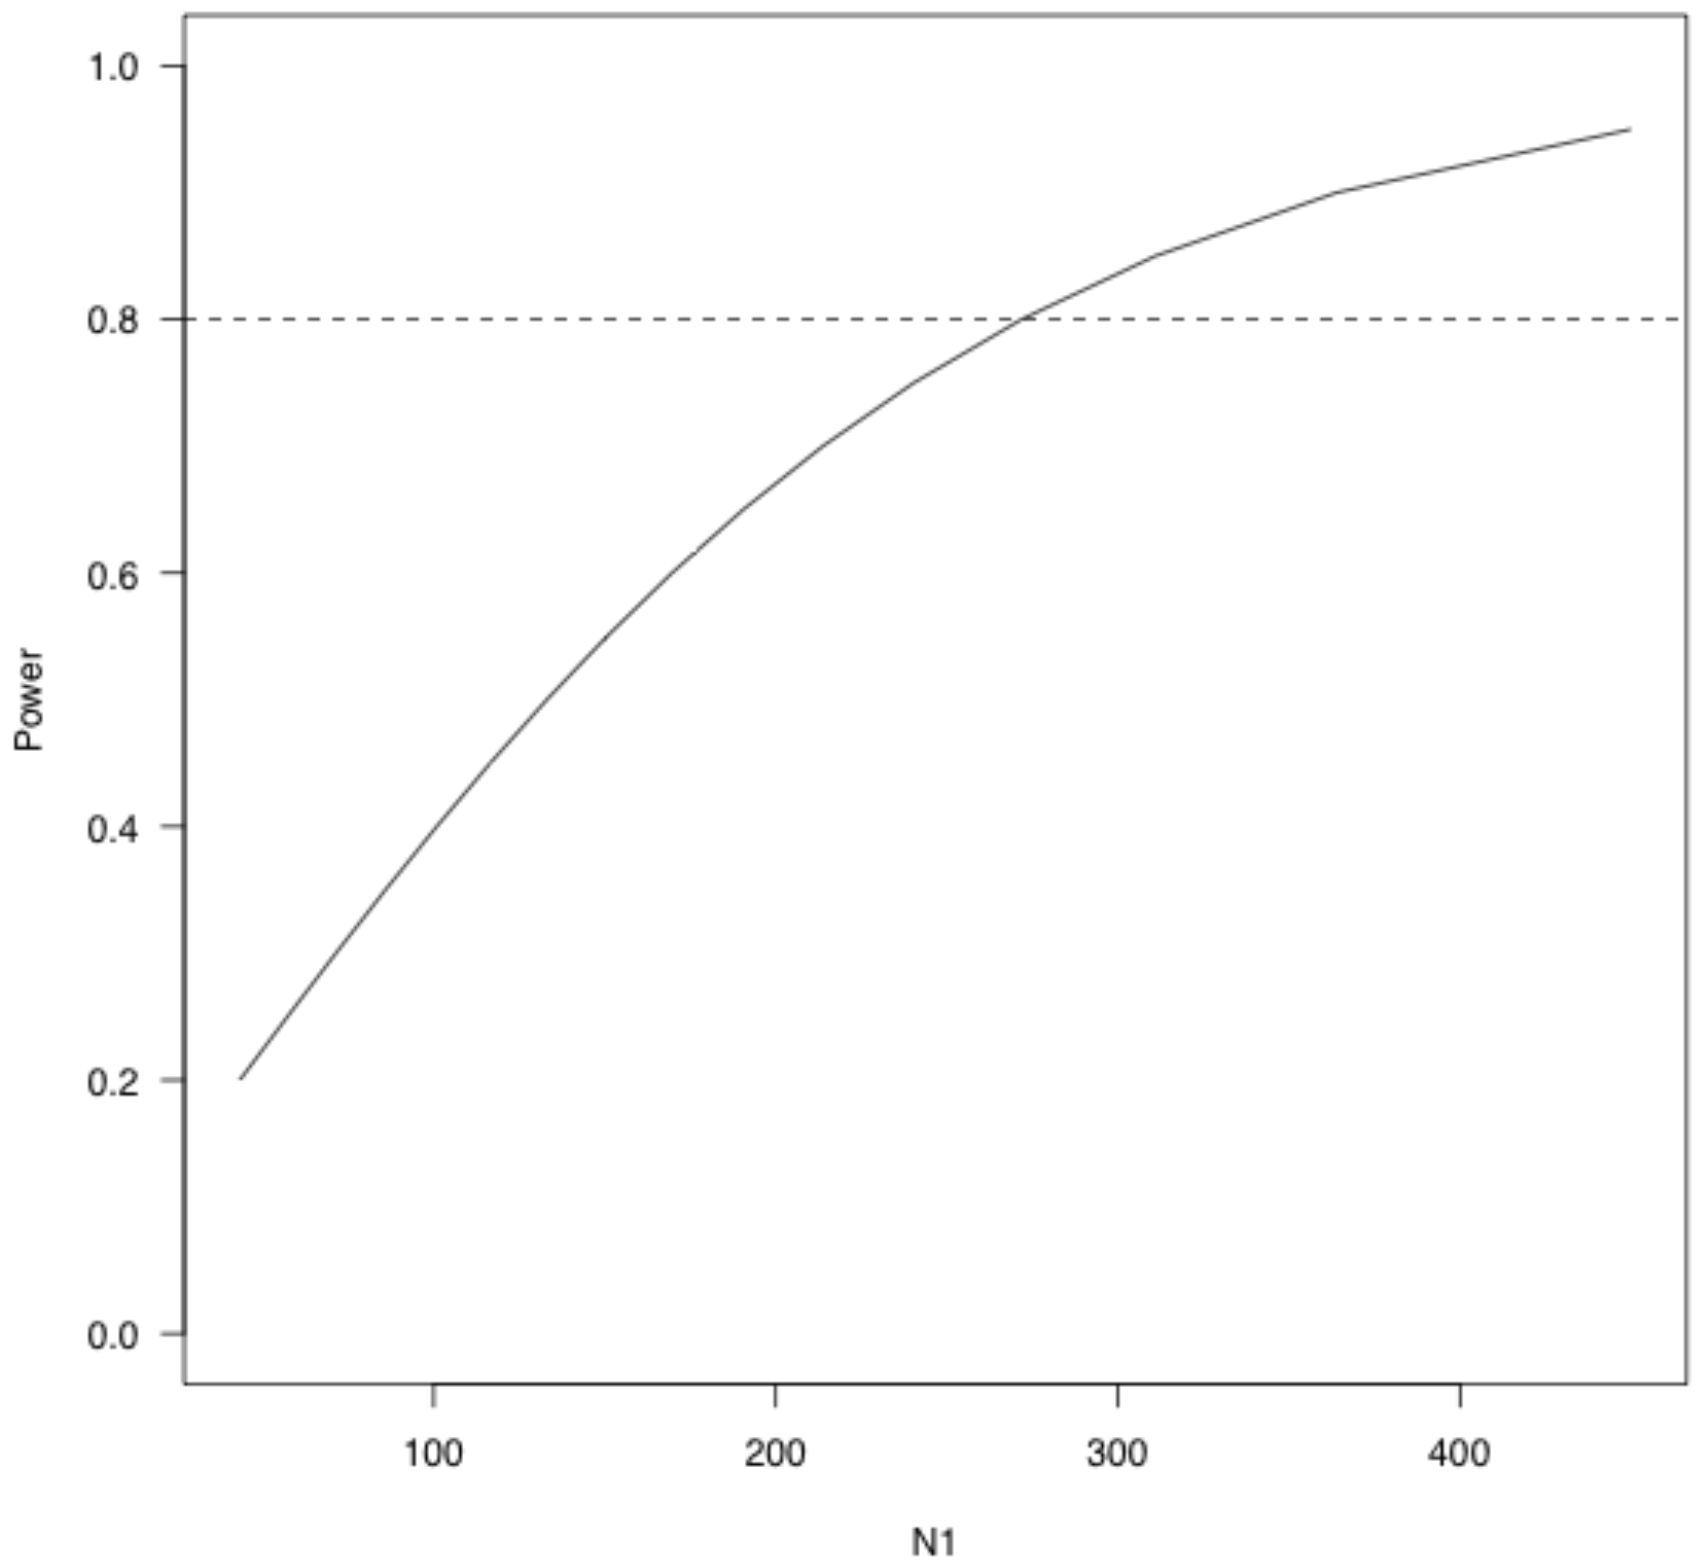

| Assumptions          |               |
|----------------------|---------------|
| Difference in means  | 0.00298       |
| Standard deviation   | 0.0124        |
| Alpha                | 0.05          |
|                      | two-sided     |
| Power                | 0.8           |
| N2/N1                | 1             |
| Required sample size |               |
| N1                   | Estimated 272 |
| N2                   | 272           |
