# Supplementary material for: Lubiprostone improves intestinal permeability in humans, a novel therapy for the leaky gut: A prospective randomized pilot study in healthy volunteers
Source: PubMed Central journal article supplement (PMC5391961; doi:10.1371/journal.pone.0175626), 2017-04-14
Supplement: pone.0175626.s004.pdf [file pone.0175626.s004.pdf]

# Replace with Main Title

Your Name

2017-02-23

```
> #####Read Data From Text File#####  
> primary_data <- read.table("/Users/takakato222/Desktop/primary data.csv  
+ header=TRUE, sep="," , na.strings=c("", "NA"), dec=".", fill=TRUE,  
+ quote="\\"", strip.white=TRUE)  
> primary_data <- read.table("/Users/takakato222/Desktop/primary data.csv  
+ na.strings=c("", "NA"), dec=".", fill=TRUE, quote="\\"", strip.white=T
```

```
> #####Two-sample t-test#####  
> group.names <- NULL  
> group.means <- NULL  
> group.sds <- NULL  
> group.p <- NULL  
> res <- NULL  
> (res <- t.test(age~factor(Group), alternative='two.sided', conf.level=0  
+ data=primary_data))
```

welch Two Sample t-test

```
data: age by factor(Group)  
t = -0.85883, df = 24.518, p-value = 0.3988  
alternative hypothesis: true difference in means is not equal to 0  
95 percent confidence interval:  
 -2.914687  1.200401  
sample estimates:  
mean in group A mean in group B  
    22.92857    23.78571
```

```
> quartz(width=7, height=7); par(lwd=1, las=1, family="sans", cex=1, mgp=  
> boxplot(age~ factor(Group), ylab="age", xlab="Group", data=primary_data
```

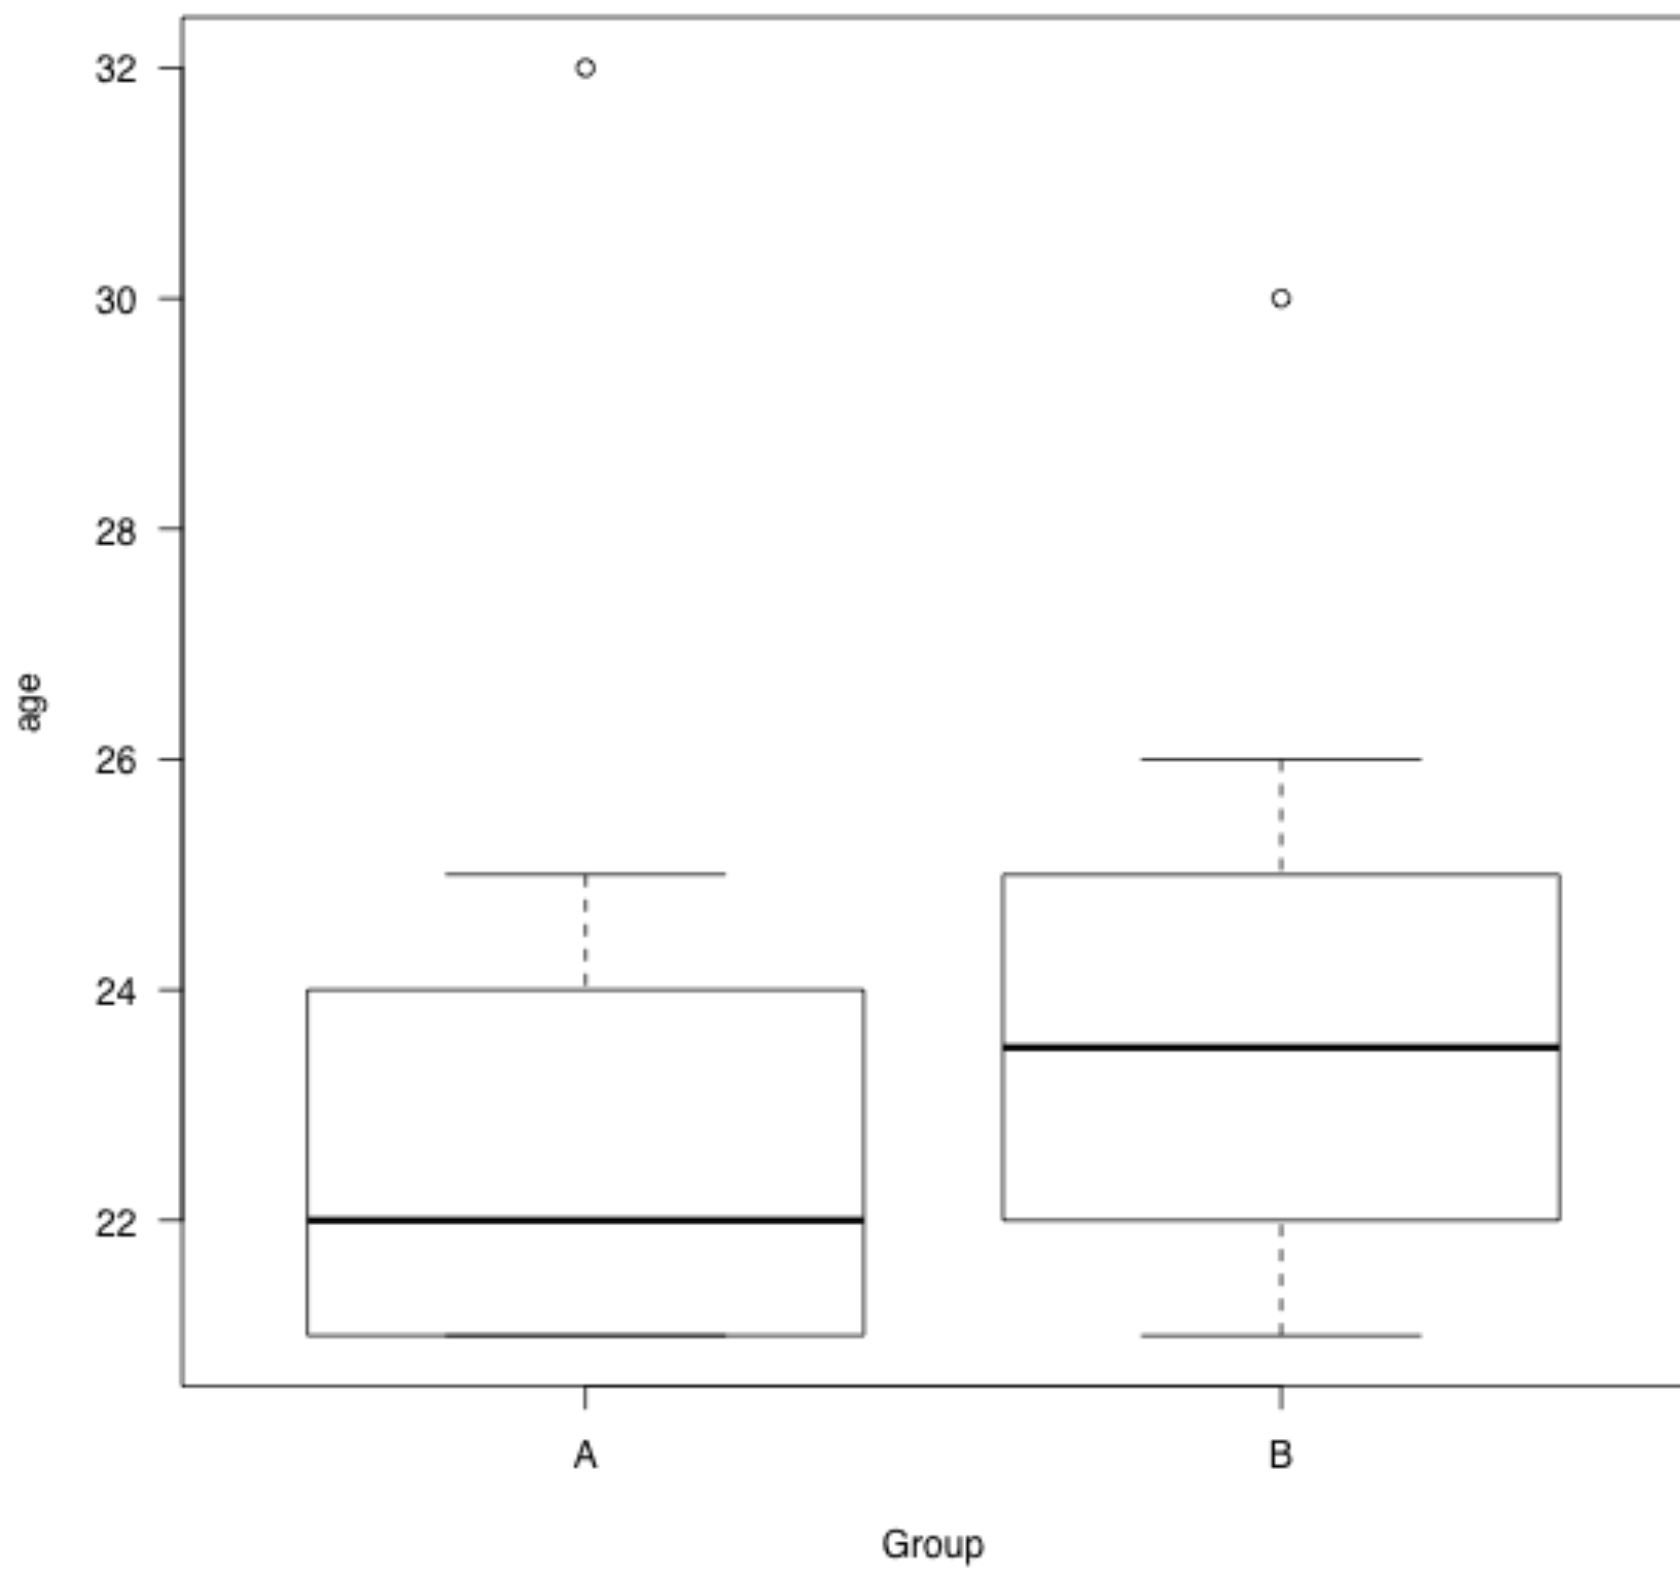

```

> bar.means <- tapply(primary_data$age, factor(primary_data$Group), mean,
> bar.sds <- tapply(primary_data$age, factor(primary_data$Group), sd, na.
> group.names <- c(group.names, "Group=A")
> group.means <- c(group.means, bar.means[1])
> group.sds <- c(group.sds, bar.sds[1])
> group.p <- c(group.p, signif(res$p.value,digits=3))
> group.names <- c(group.names, "Group=B")
> group.means <- c(group.means, bar.means[2])
> group.sds <- c(group.sds, bar.sds[2])
> group.p <- c(group.p, "")
> summary.ttest <- NULL
> summary.ttest <- data.frame(mean=group.means, sd=group.sds, p.value=gro
> rownames(summary.ttest) <- group.names
> colnames(summary.ttest) <- gettext(domain="R-RcmdrPlugin.EZR",colnames(
> summary.ttest

```

|         | mean     | sd       | p.value |
|---------|----------|----------|---------|
| Group=A | 22.92857 | 2.947340 | 0.399   |
| Group=B | 23.78571 | 2.293086 |         |

```

> #####Two-sample t-test#####
> group.names <- NULL
> group.means <- NULL
> group.sds <- NULL
> group.p <- NULL
> res <- NULL
> (res <- t.test(BMI~factor(Group), alternative='two.sided', conf.level=0
+ data=primary_data))

```

### Welch Two Sample t-test

```

data: BMI by factor(Group)
t = -0.082608, df = 21.961, p-value = 0.9349
alternative hypothesis: true difference in means is not equal to 0
95 percent confidence interval:
 -1.864819  1.721962
sample estimates:
mean in group A mean in group B
      22.64286      22.71429

```

```

> quartz(width=7, height=7); par(lwd=1, las=1, family="sans", cex=1, mgp=
> boxplot(BMI~ factor(Group), ylab="BMI", xlab="Group", data=primary_data

```

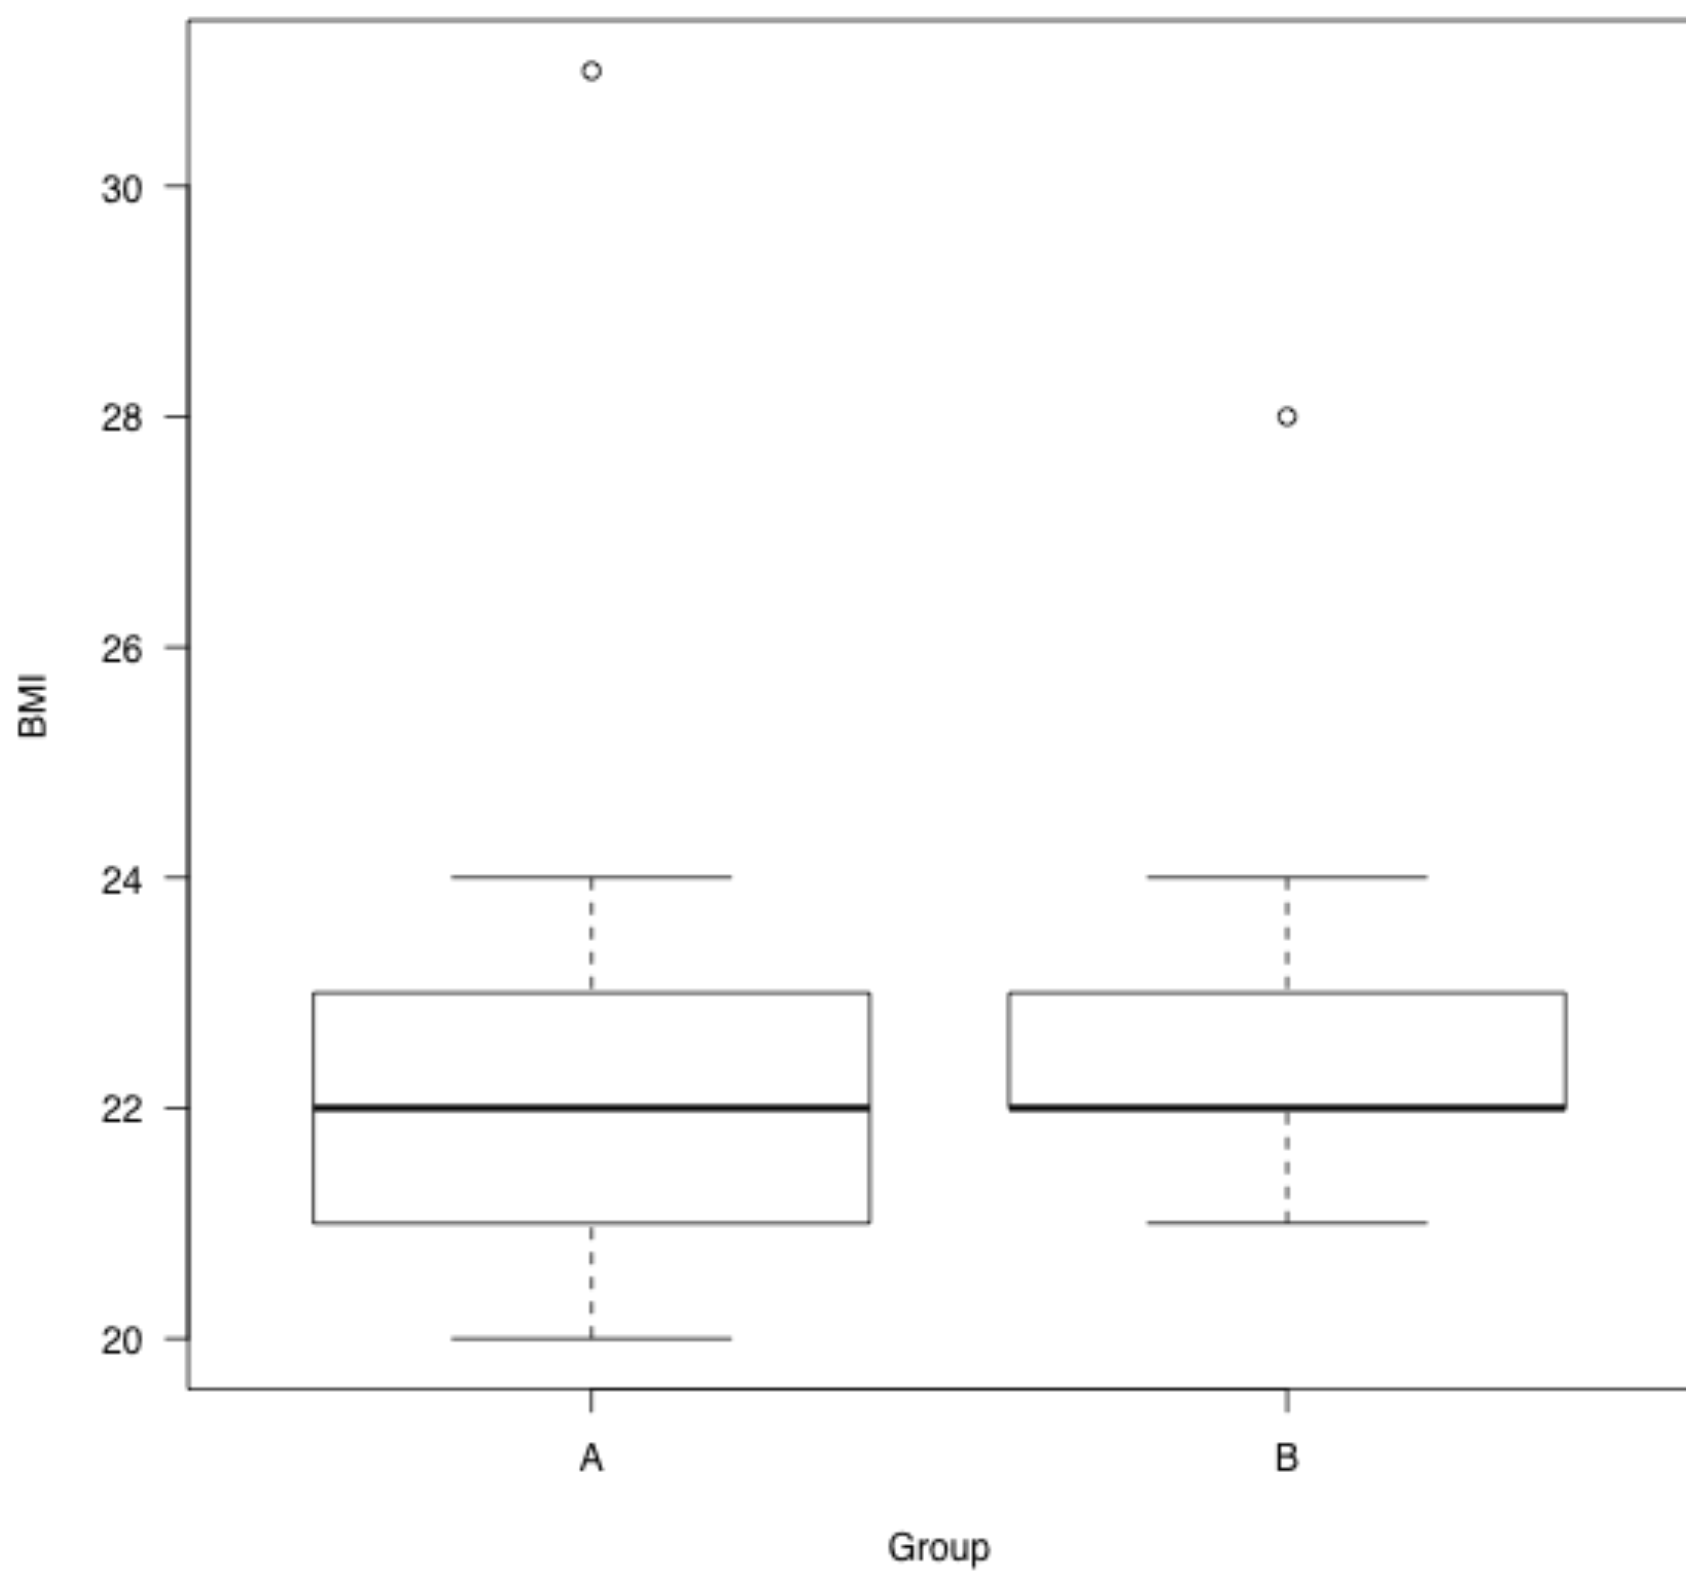

```

> bar.means <- tapply(primary_data$BMI, factor(primary_data$Group), mean,
> bar.sds <- tapply(primary_data$BMI, factor(primary_data$Group), sd, na.
> group.names <- c(group.names, "Group=A")
> group.means <- c(group.means, bar.means[1])
> group.sds <- c(group.sds, bar.sds[1])
> group.p <- c(group.p, signif(res$p.value,digits=3))
> group.names <- c(group.names, "Group=B")
> group.means <- c(group.means, bar.means[2])
> group.sds <- c(group.sds, bar.sds[2])
> group.p <- c(group.p, "")
> summary.ttest <- NULL
> summary.ttest <- data.frame(mean=group.means, sd=group.sds, p.value=gro
> rownames(summary.ttest) <- group.names
> colnames(summary.ttest) <- gettext(domain="R-RcmdrPlugin.EZR",colnames(
> summary.ttest

```

|         | mean     | sd       | p.value |
|---------|----------|----------|---------|
| Group=A | 22.64286 | 2.734597 | 0.935   |
| Group=B | 22.71429 | 1.728876 |         |

```

> #####Two-sample t-test#####
> group.names <- NULL
> group.means <- NULL
> group.sds <- NULL
> group.p <- NULL
> res <- NULL
> (res <- t.test(LMR1~factor(Group), alternative='two.sided', conf.level=
+ data=primary_data))

```

### Welch Two Sample t-test

```

data: LMR1 by factor(Group)
t = 0.39457, df = 22.995, p-value = 0.6968
alternative hypothesis: true difference in means is not equal to 0
95 percent confidence interval:
 -0.009225657  0.013574431
sample estimates:
mean in group A mean in group B
 0.02079417      0.01861978

```

```

> quartz(width=7, height=7); par(lwd=1, las=1, family="sans", cex=1, mgp=
> boxplot(LMR1~ factor(Group), ylab="LMR1", xlab="Group", data=primary_da

```

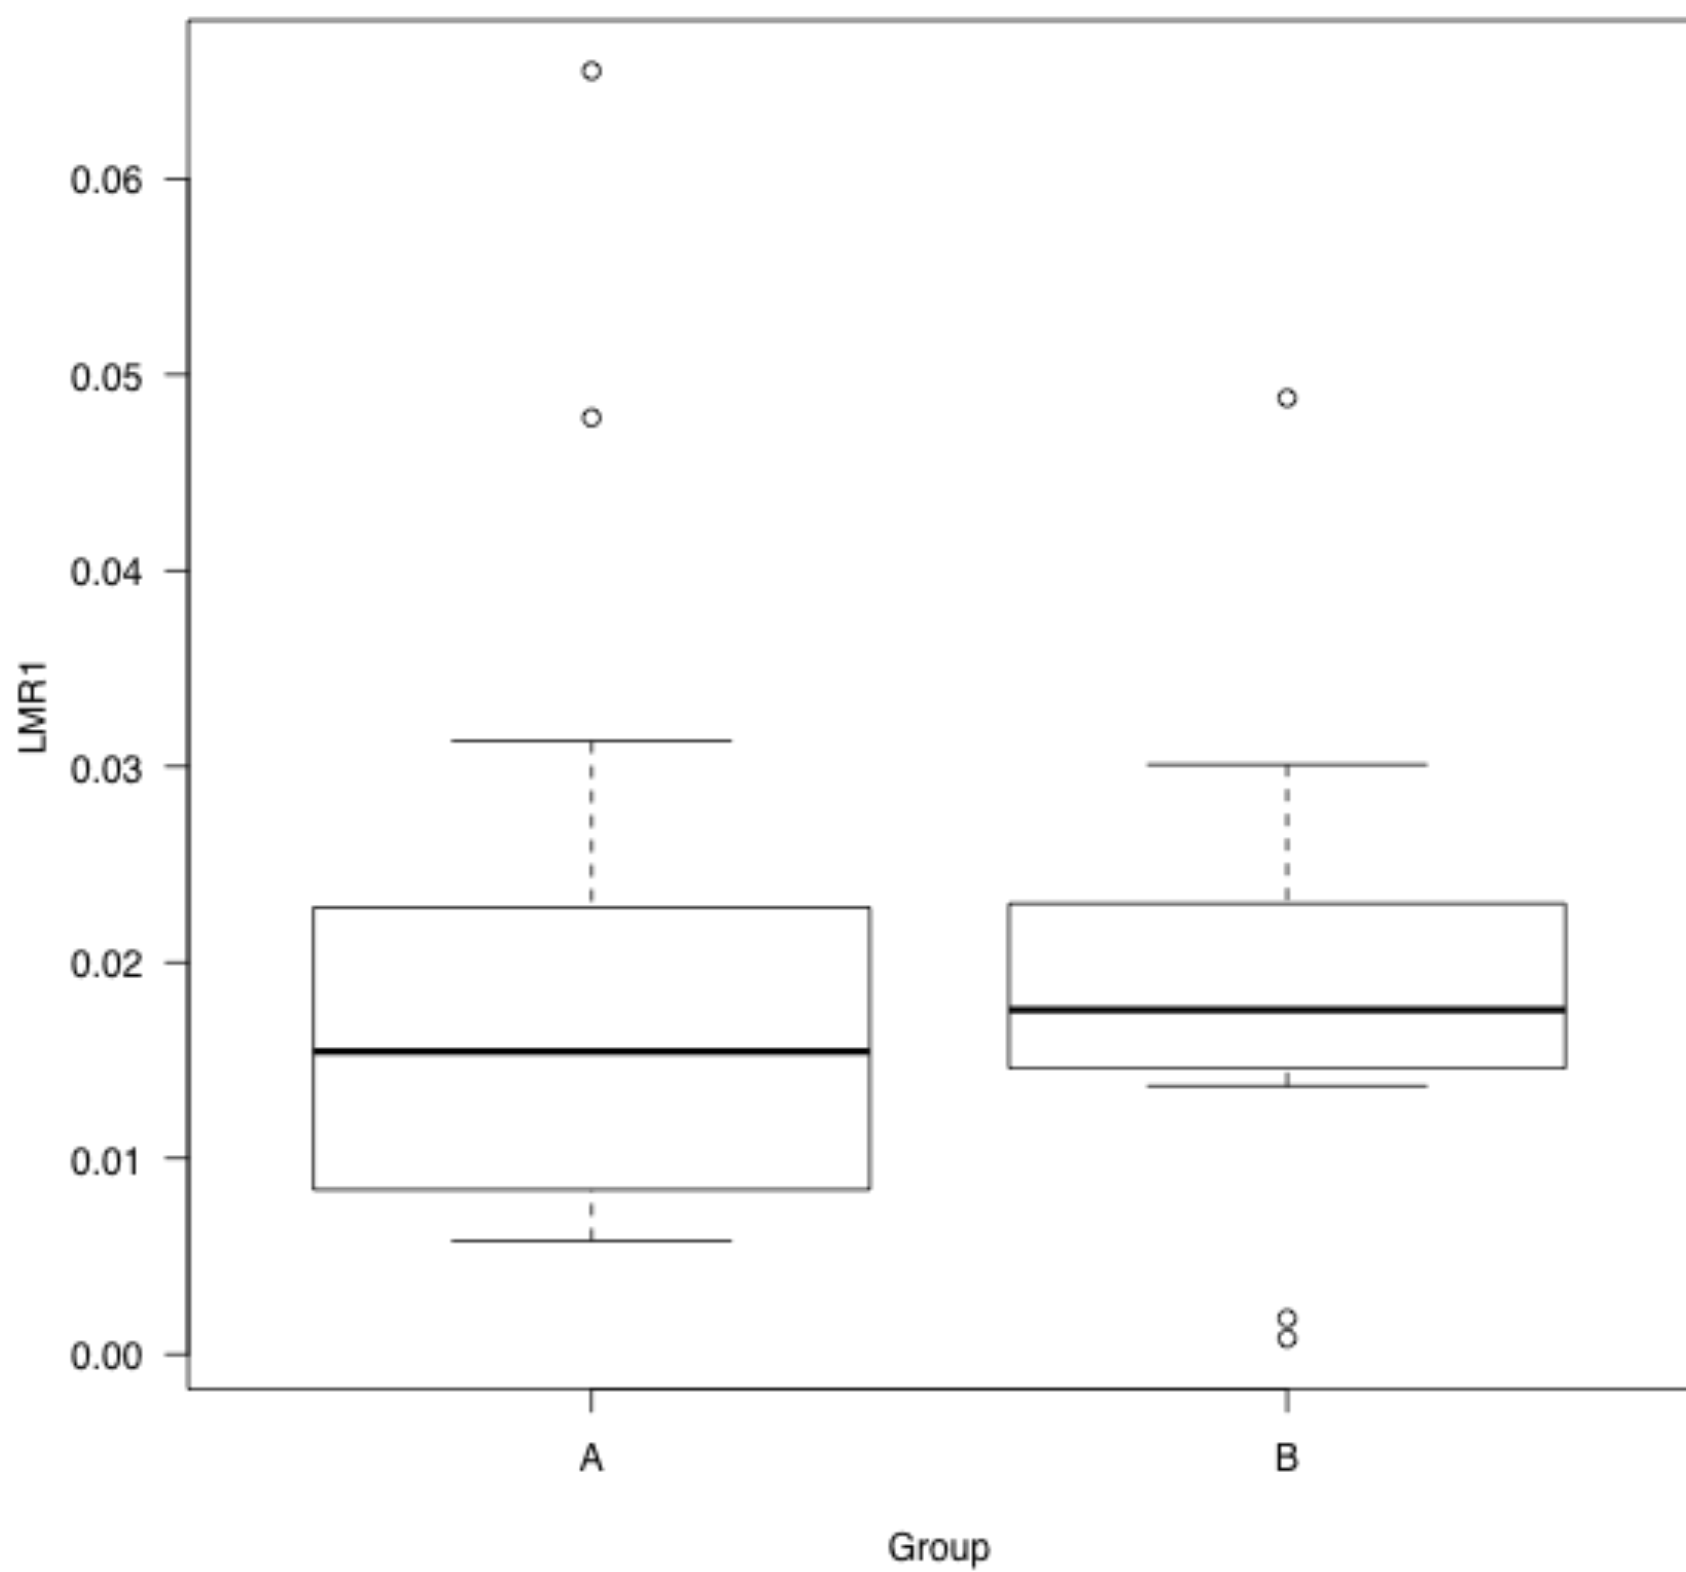

```

> bar.means <- tapply(primary_data$LMR1, factor(primary_data$Group), mean)
> bar.sds <- tapply(primary_data$LMR1, factor(primary_data$Group), sd, na.rm=TRUE)
> group.names <- c(group.names, "Group=A")
> group.means <- c(group.means, bar.means[1])
> group.sds <- c(group.sds, bar.sds[1])
> group.p <- c(group.p, signif(res$p.value,digits=3))
> group.names <- c(group.names, "Group=B")
> group.means <- c(group.means, bar.means[2])
> group.sds <- c(group.sds, bar.sds[2])
> group.p <- c(group.p, "")
> summary.ttest <- NULL
> summary.ttest <- data.frame(mean=group.means, sd=group.sds, p.value=group.p)
> rownames(summary.ttest) <- group.names
> colnames(summary.ttest) <- gettext(domain="R-RcmdrPlugin.EZR",colnames(summary.ttest))
> summary.ttest

```

|         | mean       | sd         | p.value |
|---------|------------|------------|---------|
| Group=A | 0.02079417 | 0.01701260 | 0.697   |
| Group=B | 0.01861978 | 0.01165042 |         |

```

> #####ANCOVA#####
> TempDF <- primary_data
> quartz(width=7, height=7); par(lwd=1, las=1, family="sans", cex=1, mgp=c(0,0,0))
> scatterplot(LMR2 ~ LMR1 | factor(Group), reg.line=lm, smooth=FALSE, spr=1,
+ by.groups=TRUE, data=TempDF)

```

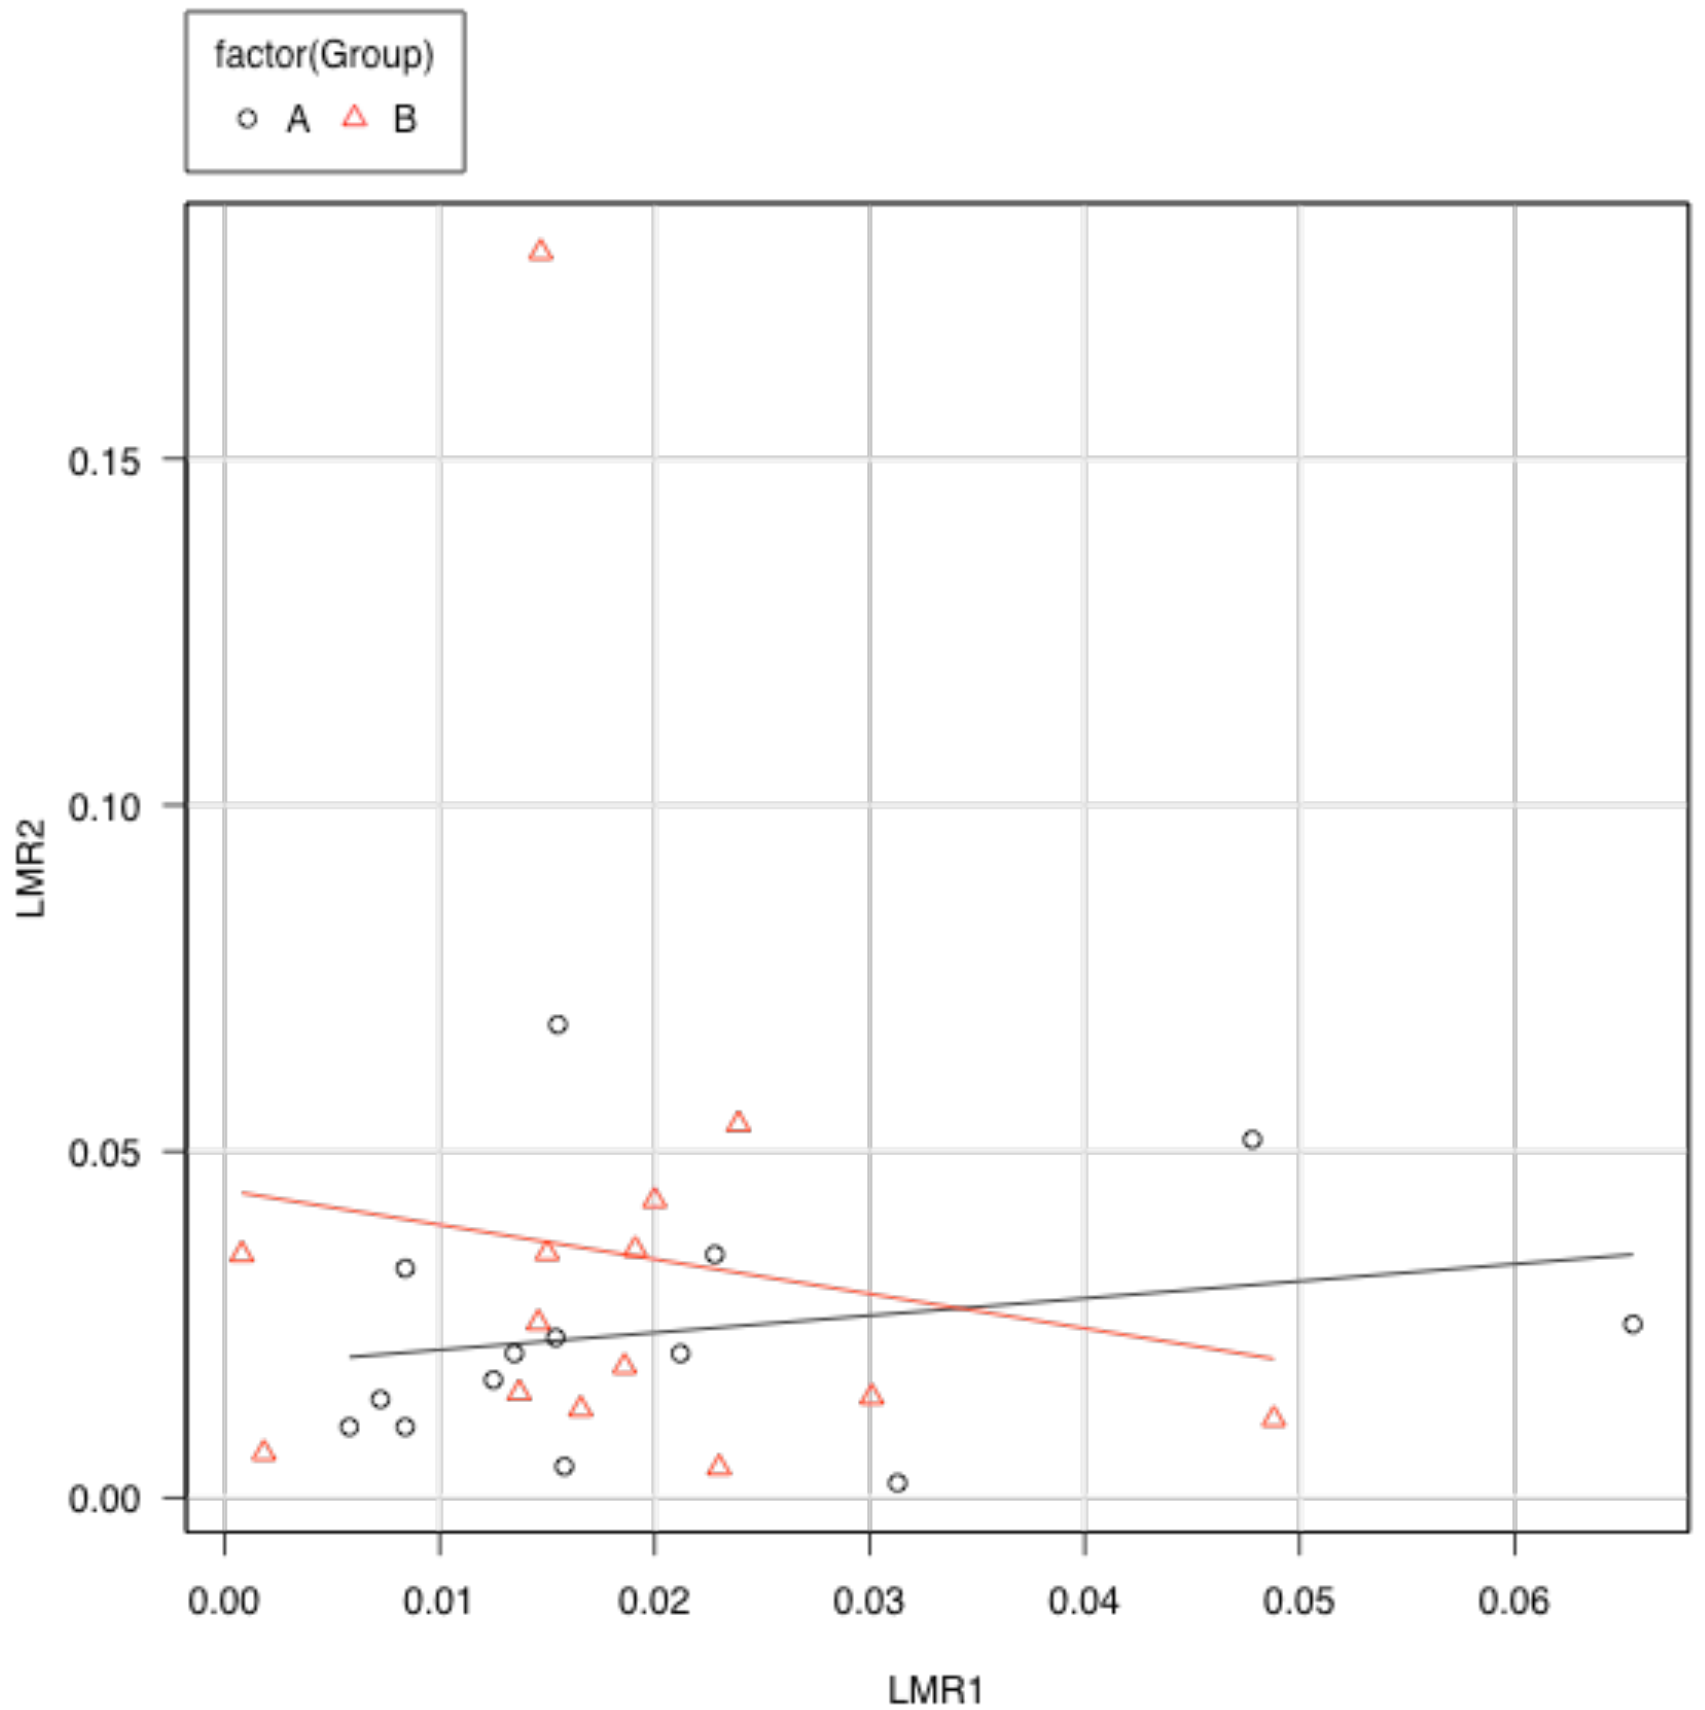

```
> cat(gettext(domain="R-RcmdrPlugin.EZR",
+ "P value for interaction between grouping variable and covariate is")
+ ")")
```

P value for interaction between grouping variable and covariate is 0.464

```
> AnovaModel.1 <- AnovaModel.1 <- lm(LMR2 ~ 1 + factor(Group) + LMR1, dat
+ na.action=na.omit)
> Anova(AnovaModel.1, type="III")
```



## Anova Table (Type III tests)

Response: LMR2

|               | Sum Sq    | Df | F value | Pr(>F)    |
|---------------|-----------|----|---------|-----------|
| (Intercept)   | 0.0037894 | 1  | 3.1877  | 0.08633 . |
| factor(Group) | 0.0008577 | 1  | 0.7215  | 0.40372   |
| LMR1          | 0.0000005 | 1  | 0.0004  | 0.98402   |
| Residuals     | 0.0297189 | 25 |         |           |

---

Signif. codes: 0 '\*\*\*' 0.001 '\*\*' 0.01 '\*' 0.05 '.' 0.1 ' ' 1

```
> #####ANCOVA#####  
> TempDF <- primary_data  
> quartz(width=7, height=7); par(lwd=1, las=1, family="sans", cex=1, mgp=  
> scatterplot(LMR3 ~ LMR1 | factor(Group), reg.line=lm, smooth=FALSE, spr  
+ by.groups=TRUE, data=TempDF)
```

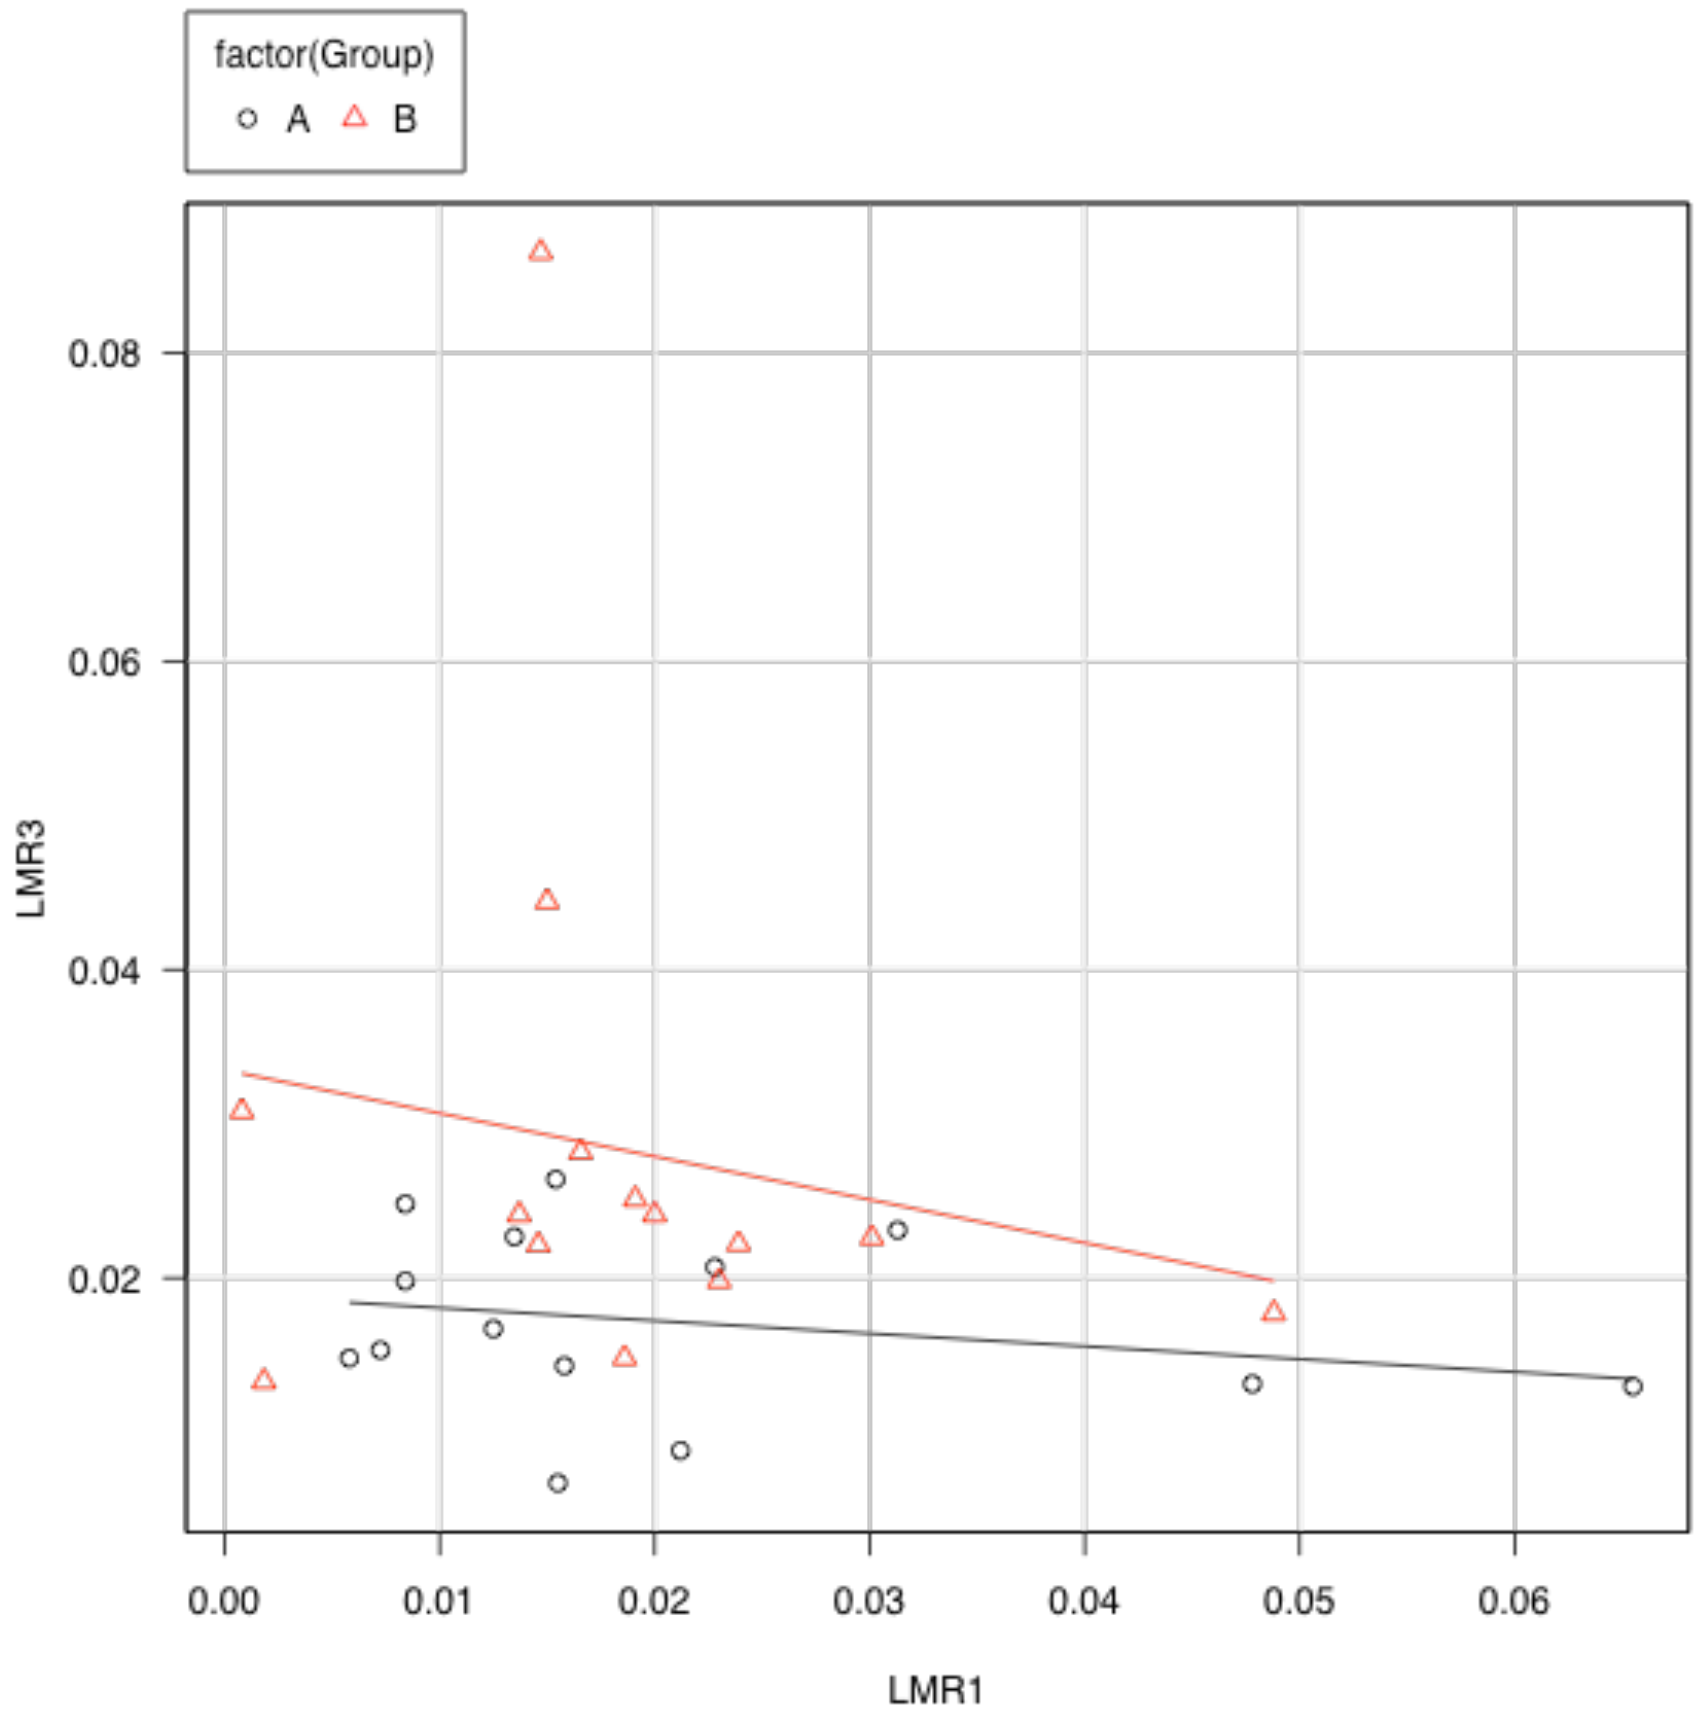

```
> cat(gettext(domain="R-RcmdrPlugin.EZR",
+ "P value for interaction between grouping variable and covariate is")
+ ")")
```

P value for interaction between grouping variable and covariate is 0.63

```
> AnovaModel.2 <- AnovaModel.2 <- lm(LMR3 ~ 1 + factor(Group) + LMR1, dat
+ na.action=na.omit)
> Anova(AnovaModel.2, type="III")
```

## Anova Table (Type III tests)

Response: LMR3

|               | Sum Sq    | Df | F value | Pr(>F)    |     |
|---------------|-----------|----|---------|-----------|-----|
| (Intercept)   | 0.0027262 | 1  | 14.3803 | 0.0008433 | *** |
| factor(Group) | 0.0008098 | 1  | 4.2714  | 0.0492630 | *   |
| LMR1          | 0.0001184 | 1  | 0.6243  | 0.4368736 |     |
| Residuals     | 0.0047395 | 25 |         |           |     |

---

Signif. codes: 0 '\*\*\*' 0.001 '\*\*' 0.01 '\*' 0.05 '.' 0.1 ' ' 1

```
> #####Two-sample t-test#####
```

```
> group.names <- NULL
```

```
> group.means <- NULL
```

```
> group.sds <- NULL
```

```
> group.p <- NULL
```

```
> res <- NULL
```

```
> (res <- t.test(Lac.1~factor(Group), alternative='two.sided', conf.level=0.95,
+ var.equal=FALSE, data=primary_data))
```

## welch Two Sample t-test

data: Lac.1 by factor(Group)

t = 0.069737, df = 24.149, p-value = 0.945

alternative hypothesis: true difference in means is not equal to 0

95 percent confidence interval:

-0.04908311 0.05251720

sample estimates:

mean in group A mean in group B

0.07040250 0.06868545

```
> quartz(width=7, height=7); par(lwd=1, las=1, family="sans", cex=1, mgp=
> boxplot(Lac.1~ factor(Group), ylab="Lac.1", xlab="Group", data=primary_
```

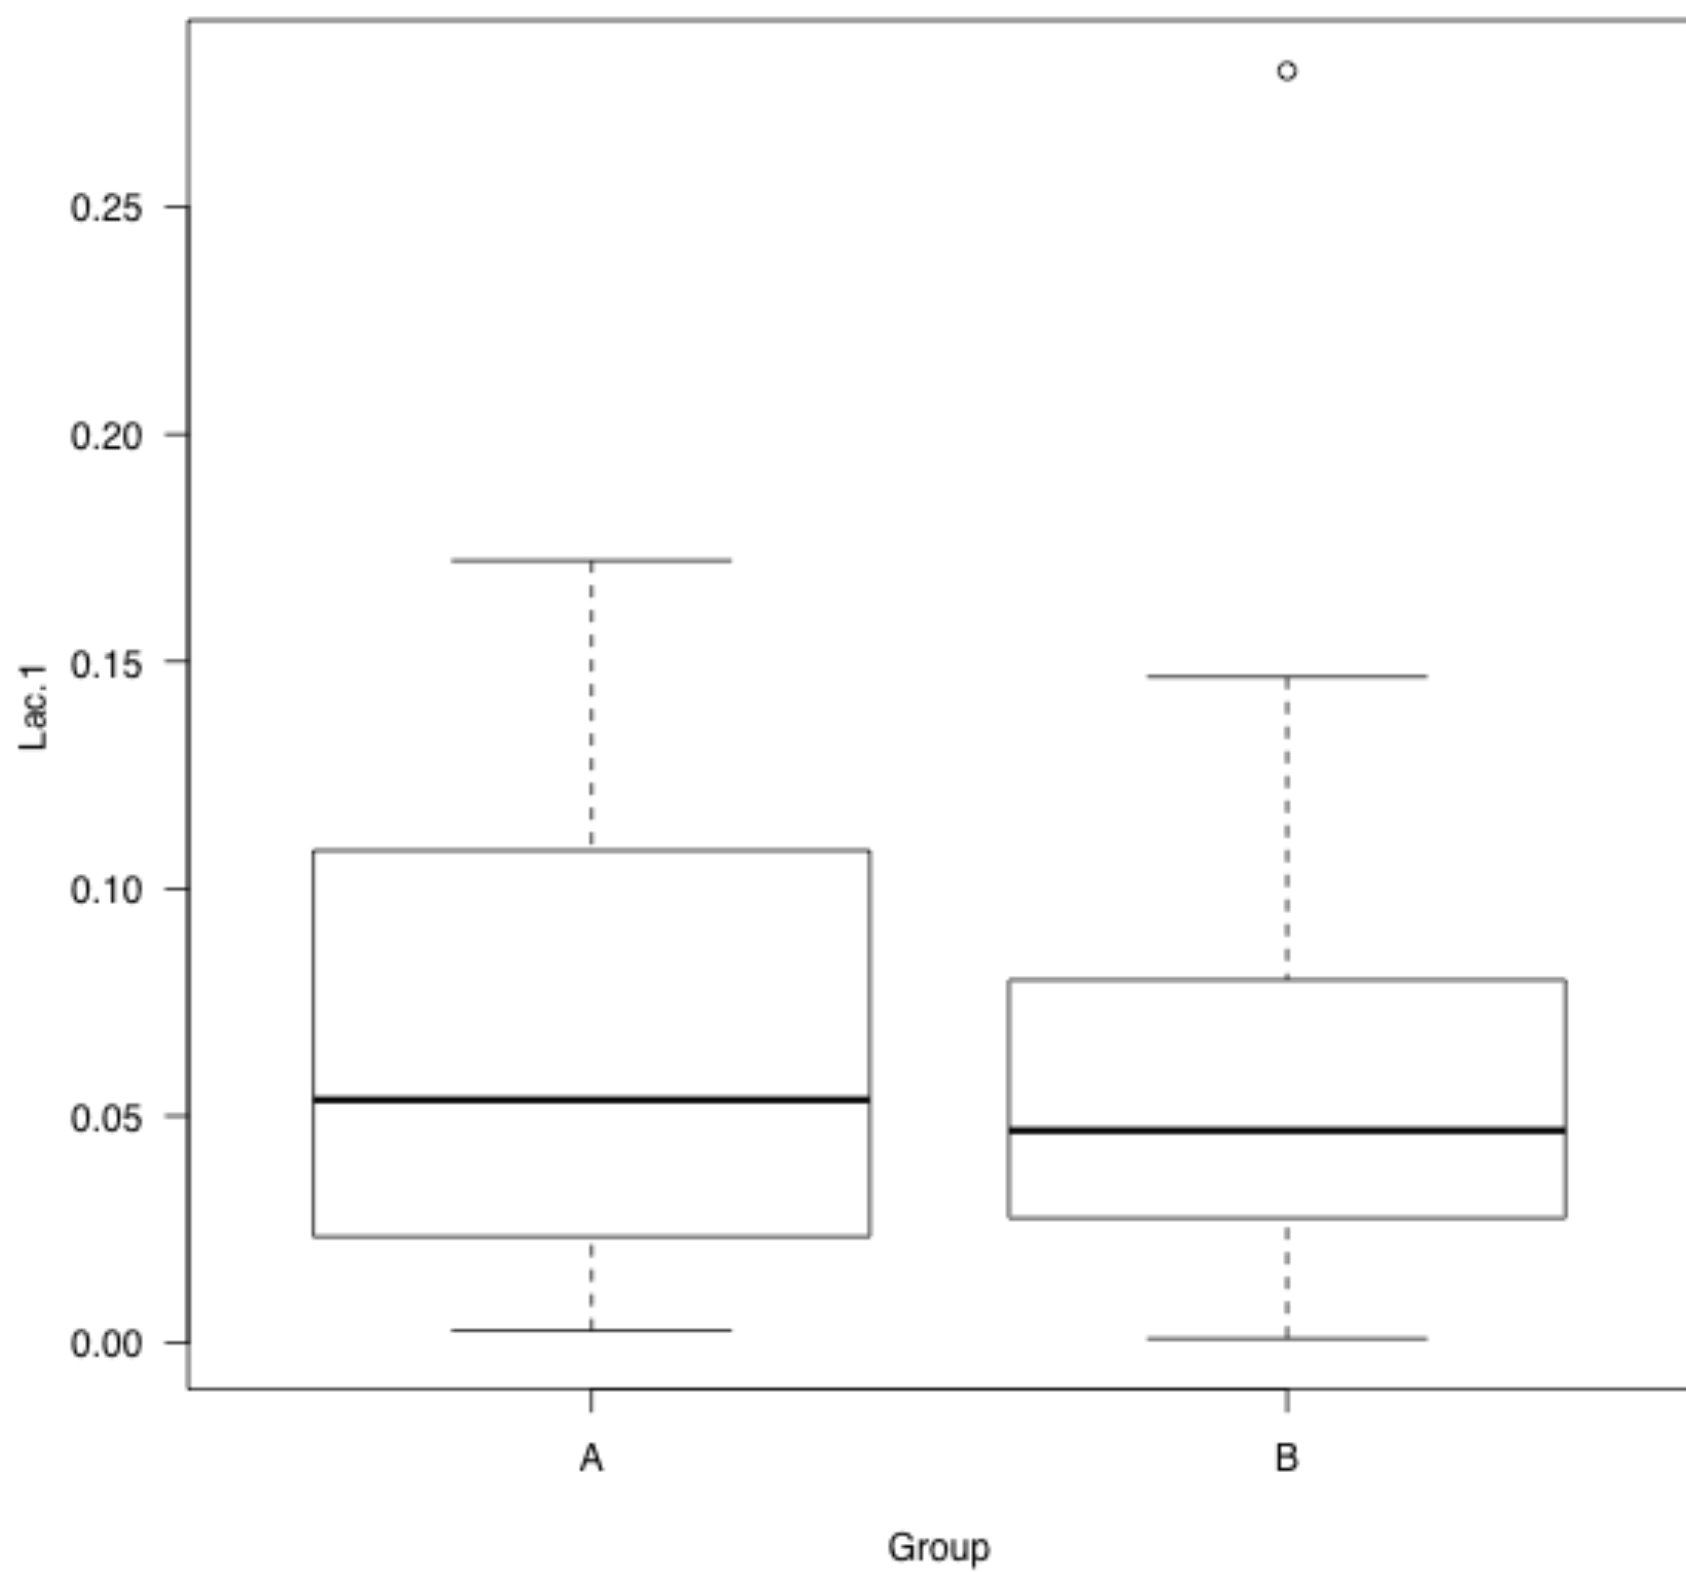

```

> bar.means <- tapply(primary_data$Lac.1, factor(primary_data$Group), mea
> bar.sds <- tapply(primary_data$Lac.1, factor(primary_data$Group), sd, n
> group.names <- c(group.names, "Group=A")
> group.means <- c(group.means, bar.means[1])
> group.sds <- c(group.sds, bar.sds[1])
> group.p <- c(group.p, signif(res$p.value,digits=3))
> group.names <- c(group.names, "Group=B")
> group.means <- c(group.means, bar.means[2])
> group.sds <- c(group.sds, bar.sds[2])
> group.p <- c(group.p, "")
> summary.ttest <- NULL
> summary.ttest <- data.frame(mean=group.means, sd=group.sds, p.value=gro
> rownames(summary.ttest) <- group.names
> colnames(summary.ttest) <- gettext(domain="R-RcmdrPlugin.EZR",colnames(
> summary.ttest

```

|         | mean       | sd         | p.value |
|---------|------------|------------|---------|
| Group=A | 0.07040250 | 0.05539498 | 0.945   |
| Group=B | 0.06868545 | 0.07361109 |         |

```

> #####ANCOVA#####
+ TempDF <- primary_data
+ quartz(width=7, height=7); par(lwd=1, las=1, family="sans", cex=1, mgp=
+ scatterplot(Lac.2 ~ Lac.1 | factor(Group), reg.line=lm, smooth=FALSE, s
+ by.groups=TRUE, data=TempDF)
+ cat(gettext(domain="R-RcmdrPlugin.EZR",
+ "P value for interaction between grouping variable and covariate is")
+ ")
+ ANCOVA not performed due to significant interaction between grouping va

```

```

Error: <text>:9:8: unexpected symbol
8: ")
9: ANCOVA not
  ^

```

```

> #####Two-sample t-test#####
> group.names <- NULL
> group.means <- NULL
> group.sds <- NULL
> group.p <- NULL
> res <- NULL
> (res <- t.test(Lac.2~factor(Group), alternative='two.sided', conf.level=
+ var.equal=FALSE, data=primary_data))

```

## welch Two Sample t-test

```
data: Lac.2 by factor(Group)
t = -0.67776, df = 14.961, p-value = 0.5083
alternative hypothesis: true difference in means is not equal to 0
95 percent confidence interval:
 -0.6391164  0.3307795
sample estimates:
mean in group A mean in group B
 0.1337660      0.2879345
```

```
> quartz(width=7, height=7); par(lwd=1, las=1, family="sans", cex=1, mgp=
> boxplot(Lac.2~ factor(Group), ylab="Lac.2", xlab="Group", data=primary_
```

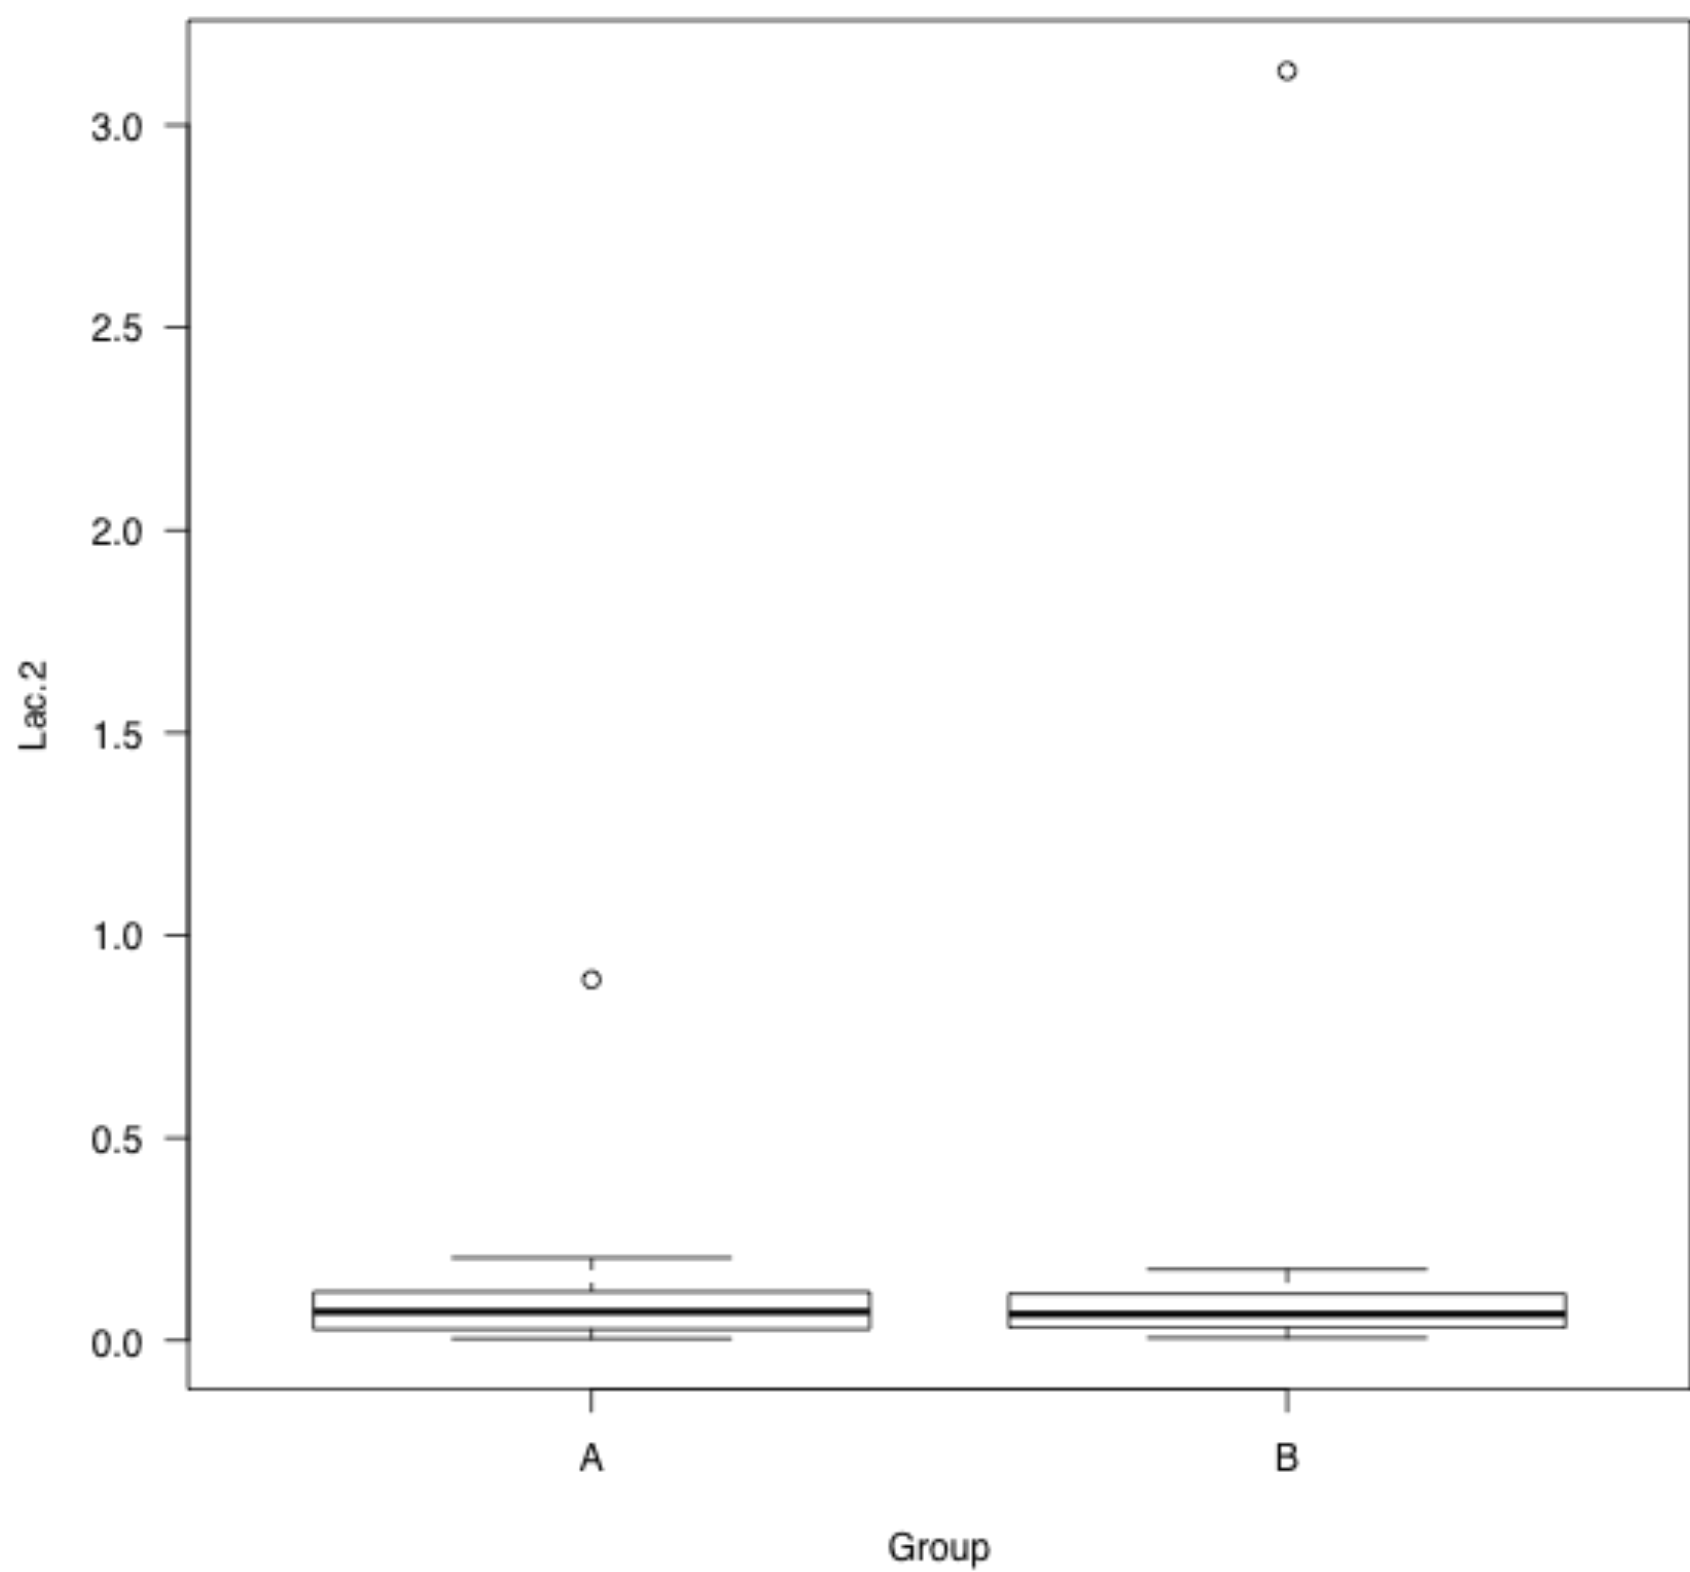

```

> bar.means <- tapply(primary_data$Lac.2, factor(primary_data$Group), mea
> bar.sds <- tapply(primary_data$Lac.2, factor(primary_data$Group), sd, n
> group.names <- c(group.names, "Group=A")
> group.means <- c(group.means, bar.means[1])
> group.sds <- c(group.sds, bar.sds[1])
> group.p <- c(group.p, signif(res$p.value,digits=3))
> group.names <- c(group.names, "Group=B")
> group.means <- c(group.means, bar.means[2])
> group.sds <- c(group.sds, bar.sds[2])
> group.p <- c(group.p, "")
> summary.ttest <- NULL
> summary.ttest <- data.frame(mean=group.means, sd=group.sds, p.value=gro
> rownames(summary.ttest) <- group.names
> colnames(summary.ttest) <- gettext(domain="R-RcmdrPlugin.EZR",colnames(
> summary.ttest

```

|         | mean      | sd        | p.value |
|---------|-----------|-----------|---------|
| Group=A | 0.1337660 | 0.2259942 | 0.508   |
| Group=B | 0.2879345 | 0.8205568 |         |

```

> #####ANCOVA#####
+ TempDF <- primary_data
+ quartz(width=7, height=7); par(lwd=1, las=1, family="sans", cex=1, mgp=
+ scatterplot(Lac.3 ~ Lac.1 | factor(Group), reg.line=lm, smooth=FALSE, s
+ by.groups=TRUE, data=TempDF)
+ cat(gettext(domain="R-RcmdrPlugin.EZR",
+ "P value for interaction between grouping variable and covariate is")
+ ")
+ ANCOVA not performed due to significant interaction between grouping va

```

```

Error: <text>:9:8: unexpected symbol
8: ")
9: ANCOVA not
  ^

```

```

> #####Two-sample t-test#####
> group.names <- NULL
> group.means <- NULL
> group.sds <- NULL
> group.p <- NULL
> res <- NULL
> (res <- t.test(Lac.3~factor(Group), alternative='two.sided', conf.level=
+ var.equal=FALSE, data=primary_data))

```



## Welch Two Sample t-test

data: Lac.3 by factor(Group)

t = -1.148, df = 17.098, p-value = 0.2668

alternative hypothesis: true difference in means is not equal to 0

95 percent confidence interval:

-0.23124066 0.06822562

sample estimates:

mean in group A mean in group B

0.08202325 0.16353077

```
> quartz(width=7, height=7); par(lwd=1, las=1, family="sans", cex=1, mgp=
> boxplot(Lac.3~ factor(Group), ylab="Lac.3", xlab="Group", data=primary_
```

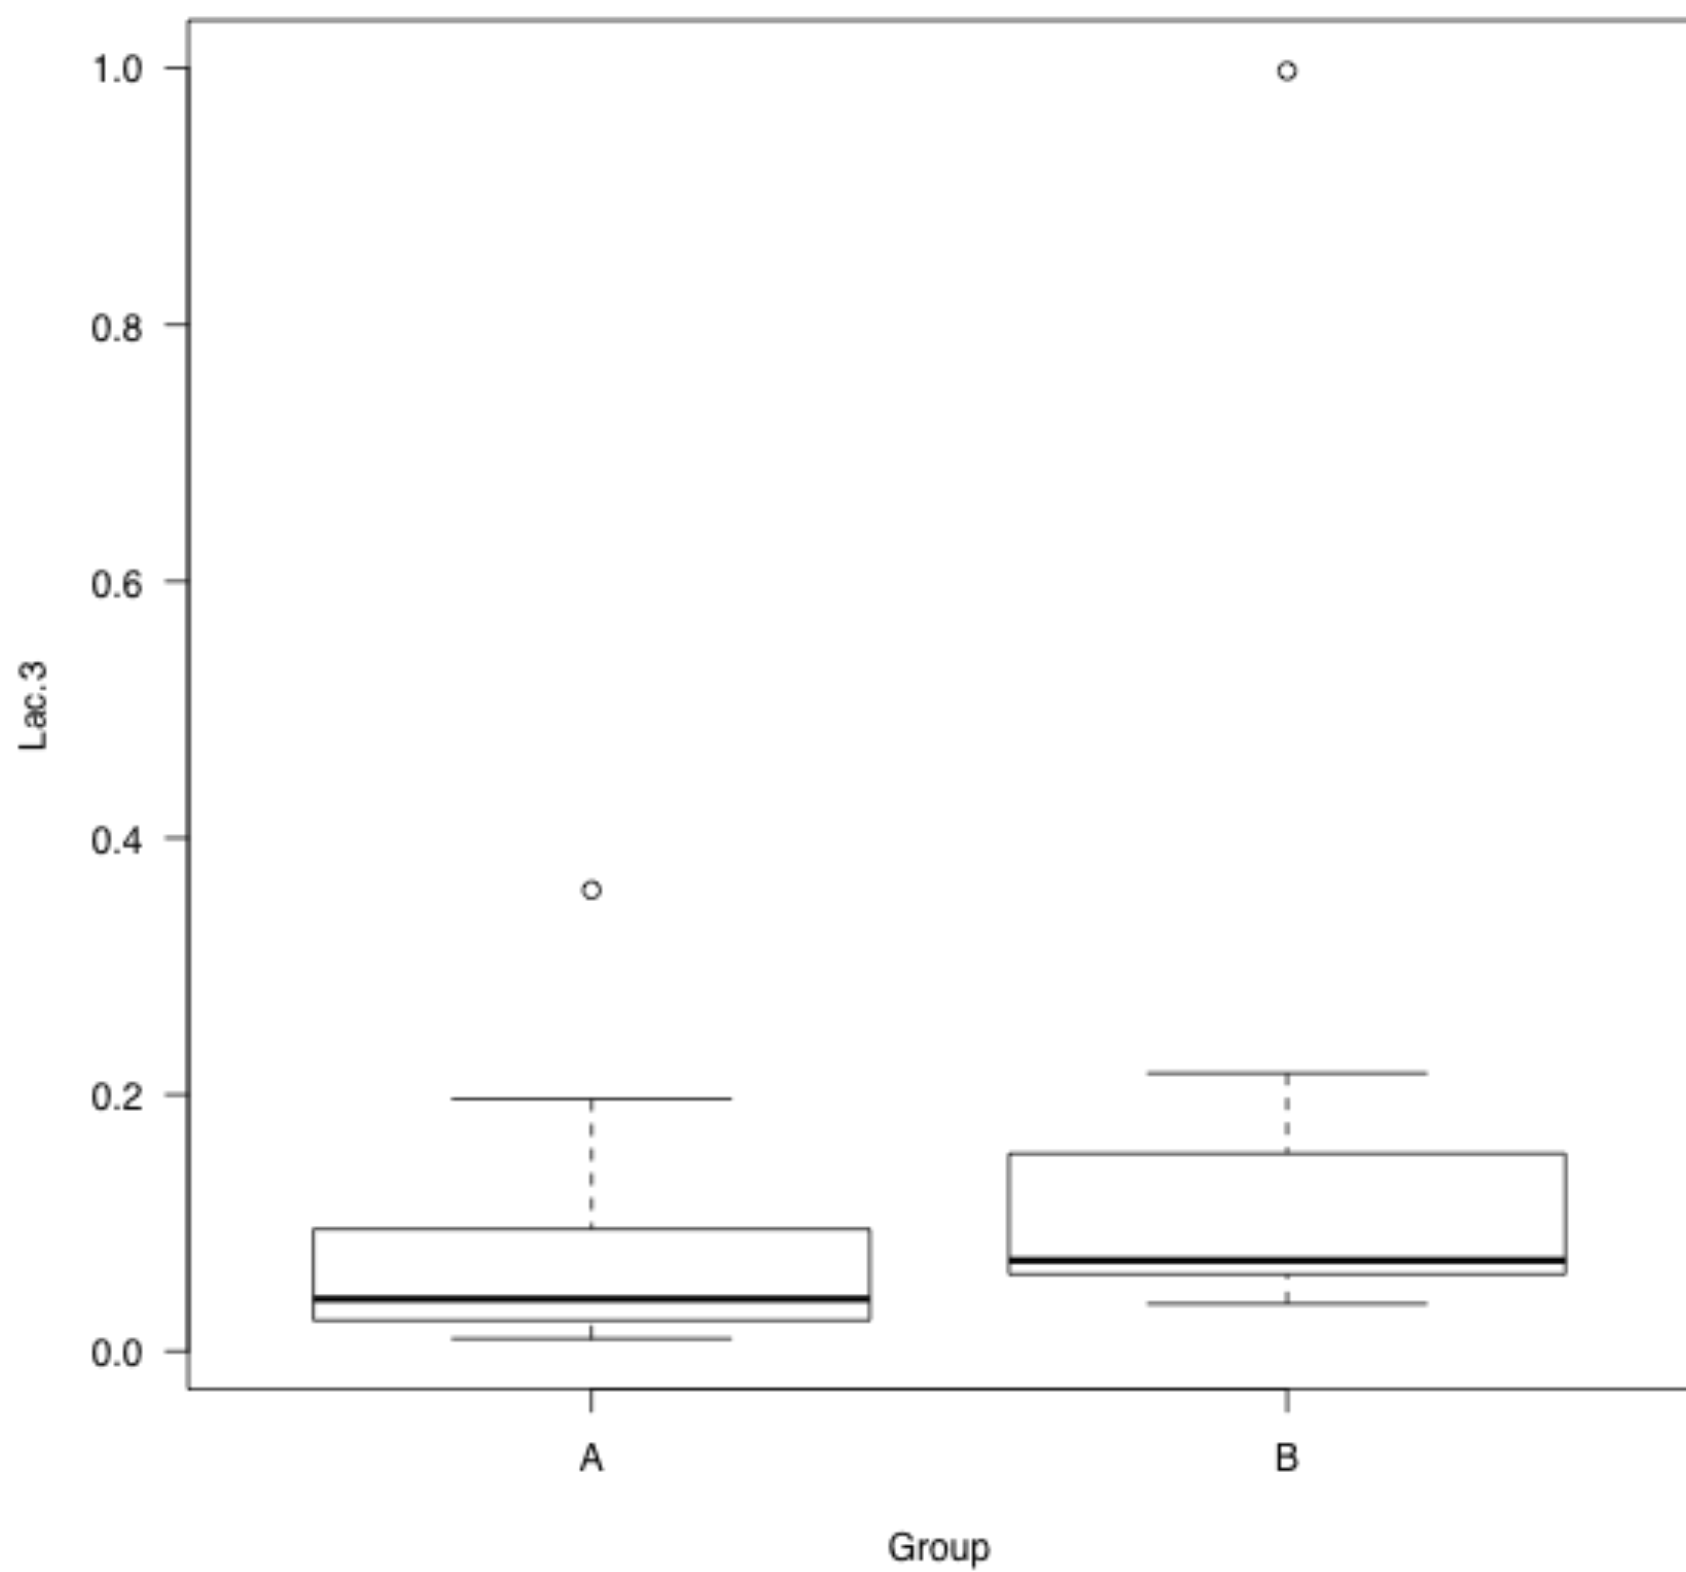

```

> bar.means <- tapply(primary_data$Lac.3, factor(primary_data$Group), mea
> bar.sds <- tapply(primary_data$Lac.3, factor(primary_data$Group), sd, n
> group.names <- c(group.names, "Group=A")
> group.means <- c(group.means, bar.means[1])
> group.sds <- c(group.sds, bar.sds[1])
> group.p <- c(group.p, signif(res$p.value,digits=3))
> group.names <- c(group.names, "Group=B")
> group.means <- c(group.means, bar.means[2])
> group.sds <- c(group.sds, bar.sds[2])
> group.p <- c(group.p, "")
> summary.ttest <- NULL
> summary.ttest <- data.frame(mean=group.means, sd=group.sds, p.value=gro
> rownames(summary.ttest) <- group.names
> colnames(summary.ttest) <- gettext(domain="R-RcmdrPlugin.EZR",colnames(
> summary.ttest

```

|         | mean       | sd         | p.value |
|---------|------------|------------|---------|
| Group=A | 0.08202325 | 0.09912205 | 0.267   |
| Group=B | 0.16353077 | 0.24647560 |         |

```

> #####Two-sample t-test#####
> group.names <- NULL
> group.means <- NULL
> group.sds <- NULL
> group.p <- NULL
> res <- NULL
> (res <- t.test(Man.1~factor(Group), alternative='two.sided', conf.level
+ var.equal=FALSE, data=primary_data))

```

### Welch Two Sample t-test

```

data: Man.1 by factor(Group)
t = -0.18537, df = 23.185, p-value = 0.8545
alternative hypothesis: true difference in means is not equal to 0
95 percent confidence interval:
 -6.417720  5.361695
sample estimates:
mean in group A mean in group B
      7.633565      8.161577

```

```

> quartz(width=7, height=7); par(lwd=1, las=1, family="sans", cex=1, mgp=
> boxplot(Man.1~ factor(Group), ylab="Man.1", xlab="Group", data=primary_

```

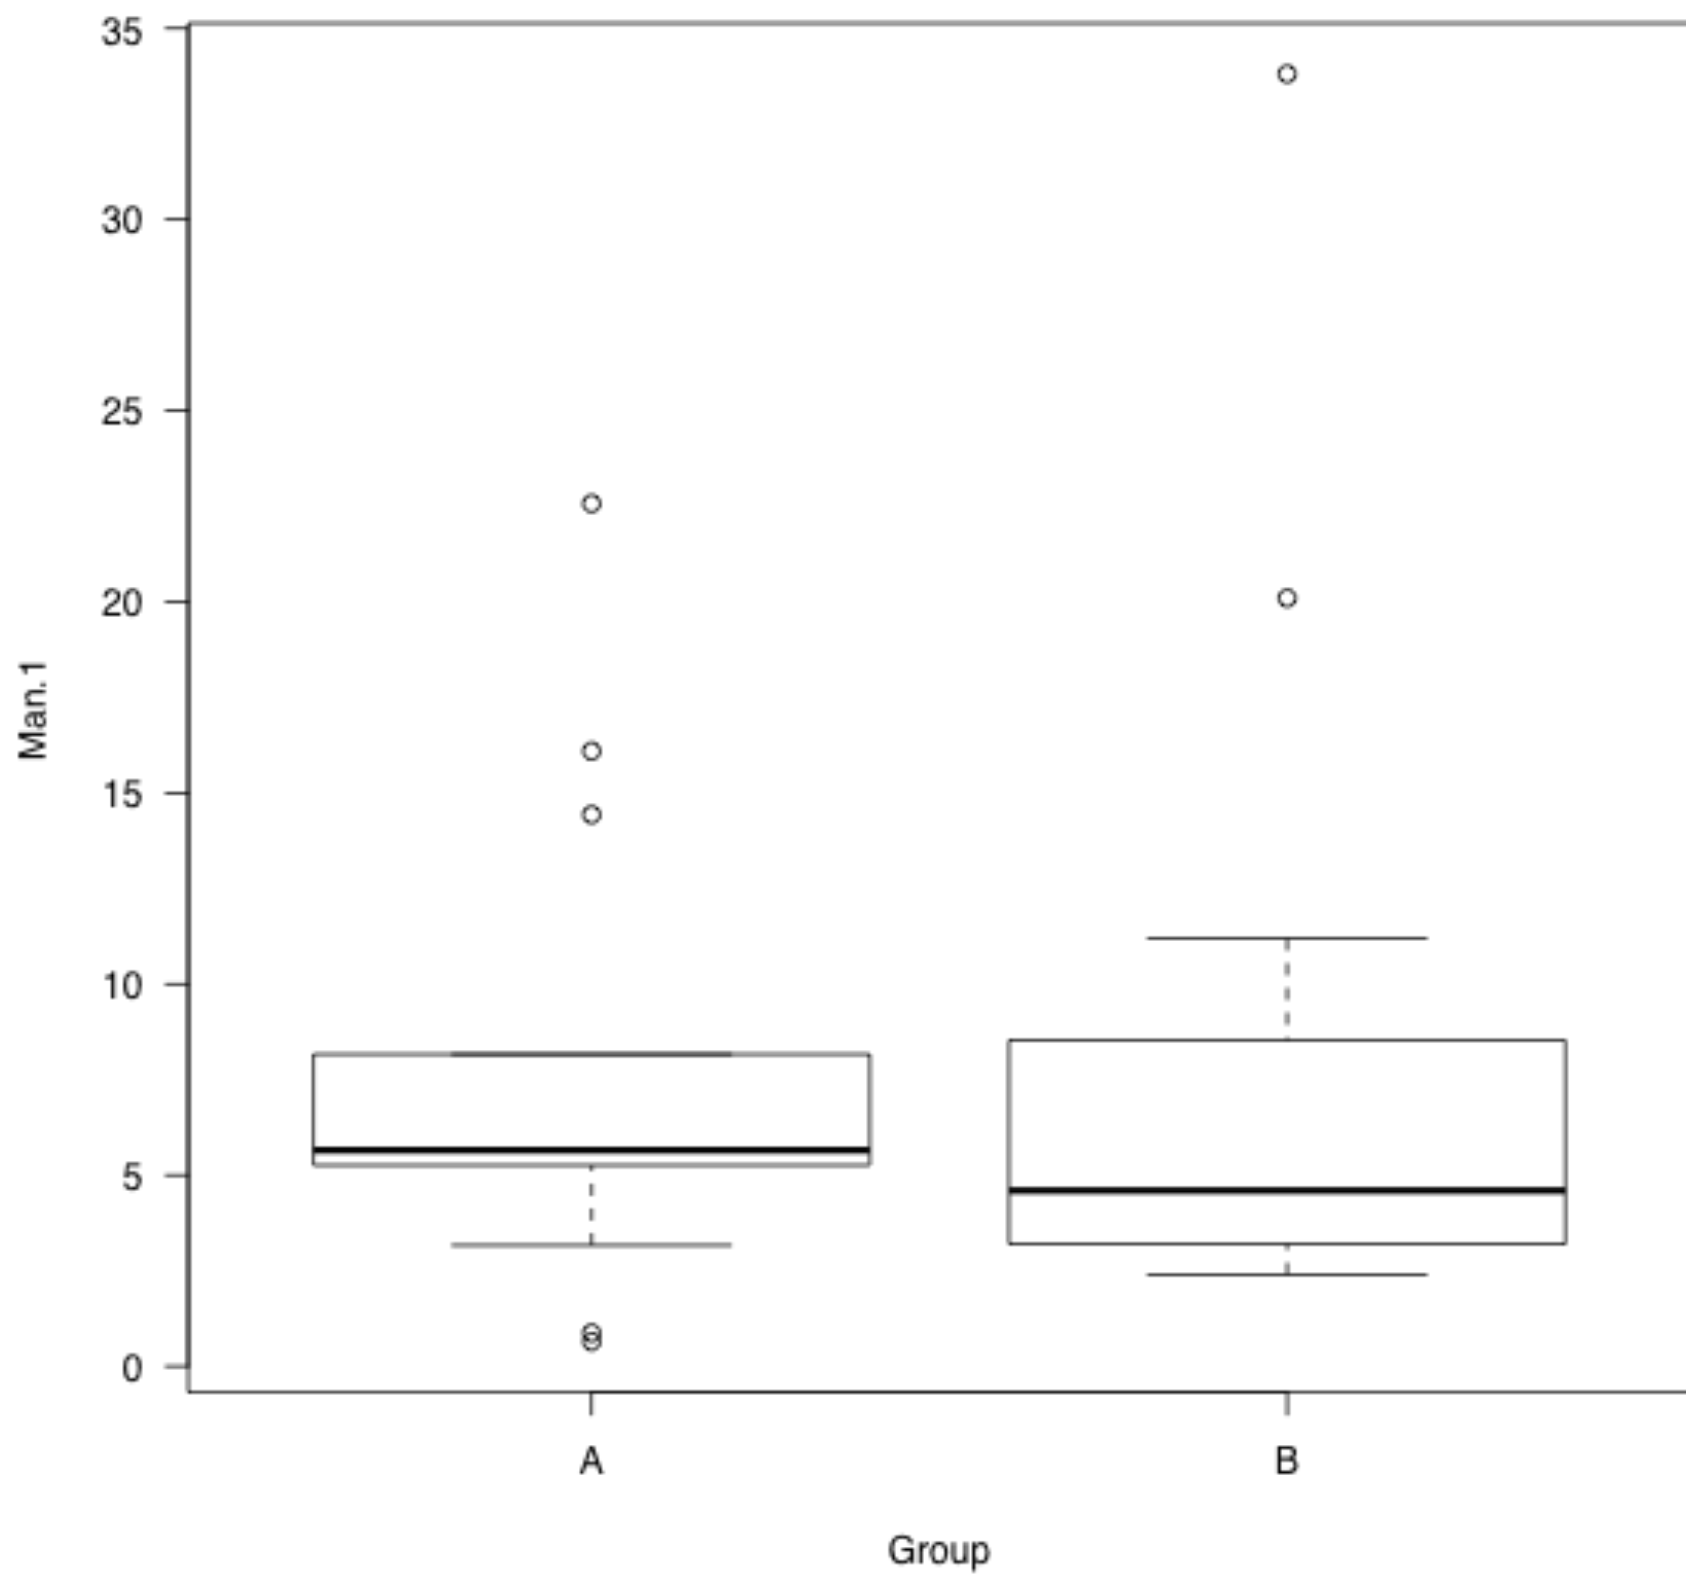

```

> bar.means <- tapply(primary_data$Man.1, factor(primary_data$Group), mea
> bar.sds <- tapply(primary_data$Man.1, factor(primary_data$Group), sd, n
> group.names <- c(group.names, "Group=A")
> group.means <- c(group.means, bar.means[1])
> group.sds <- c(group.sds, bar.sds[1])
> group.p <- c(group.p, signif(res$p.value,digits=3))
> group.names <- c(group.names, "Group=B")
> group.means <- c(group.means, bar.means[2])
> group.sds <- c(group.sds, bar.sds[2])
> group.p <- c(group.p, "")
> summary.ttest <- NULL
> summary.ttest <- data.frame(mean=group.means, sd=group.sds, p.value=gro
> rownames(summary.ttest) <- group.names
> colnames(summary.ttest) <- gettext(domain="R-RcmdrPlugin.EZR",colnames(
> summary.ttest

```

|         | mean     | sd       | p.value |
|---------|----------|----------|---------|
| Group=A | 7.633565 | 6.082981 | 0.855   |
| Group=B | 8.161577 | 8.751138 |         |

```

> #####ANCOVA#####
> TempDF <- primary_data
> quartz(width=7, height=7); par(lwd=1, las=1, family="sans", cex=1, mgp=
> scatterplot(Man.2 ~ Man.1 | factor(Group), reg.line=lm, smooth=FALSE, s
+   by.groups=TRUE, data=TempDF)

```

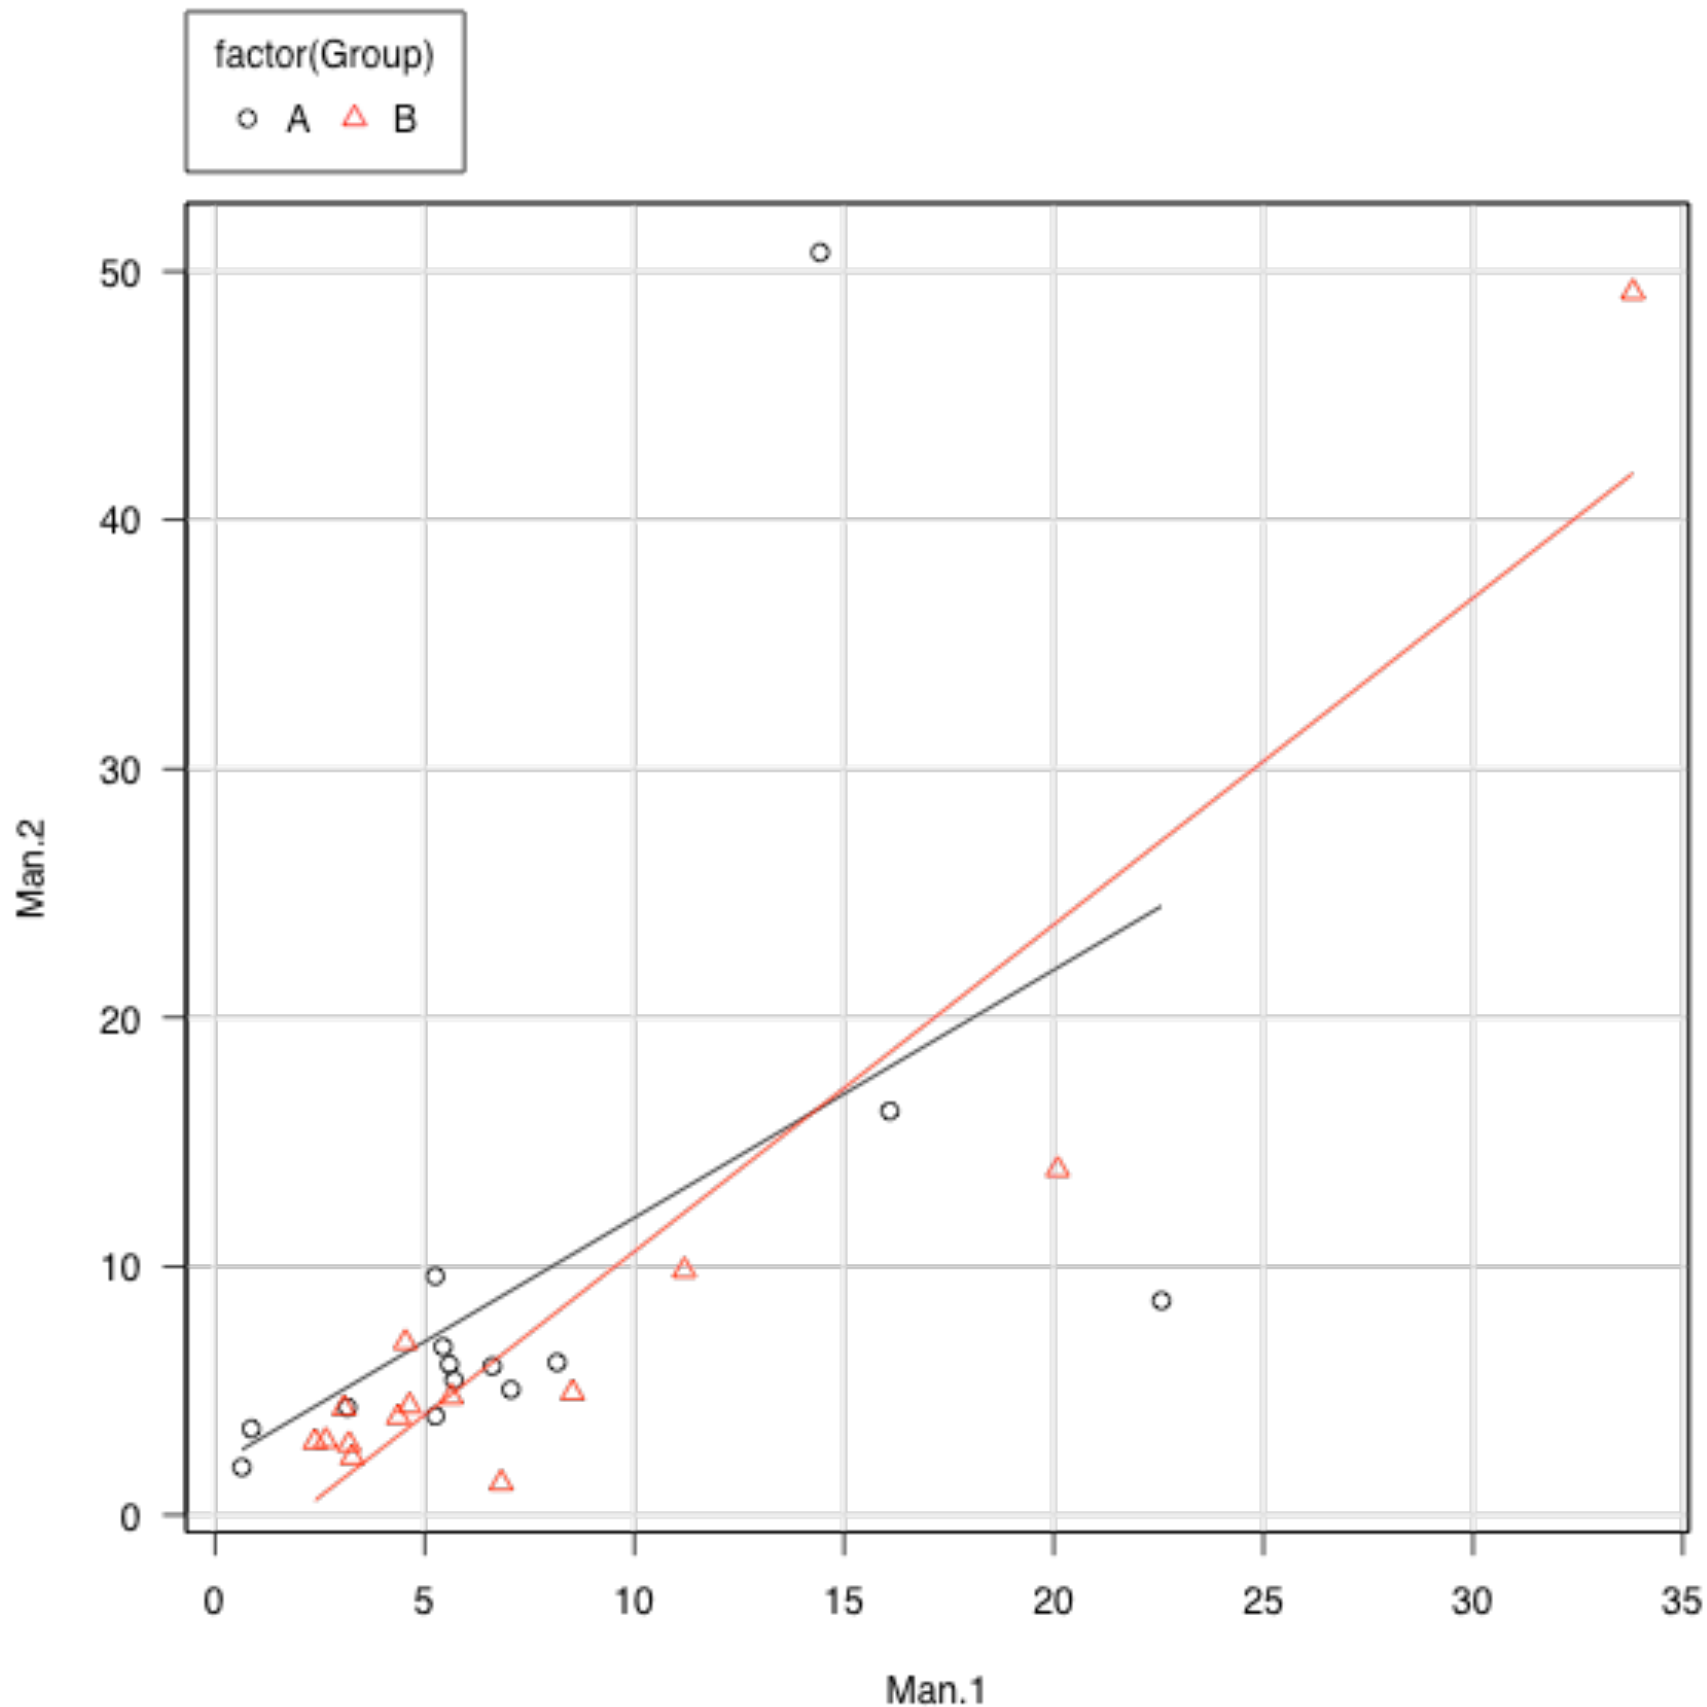

```
> cat(gettext(domain="R-RcmdrPlugin.EZR",
+ "P value for interaction between grouping variable and covariate is")
+ ")")
```

P value for interaction between grouping variable and covariate is 0.507

```
> AnovaModel.5 <- AnovaModel.5 <- lm(Man.2 ~ 1 + factor(Group) + Man.1, d
+ na.action=na.omit)
> Anova(AnovaModel.5, type="III")
```

## Anova Table (Type III tests)

Response: Man.2

|               | Sum Sq  | Df | F value | Pr(>F)        |
|---------------|---------|----|---------|---------------|
| (Intercept)   | 1.09    | 1  | 0.0155  | 0.9020        |
| factor(Group) | 29.62   | 1  | 0.4194  | 0.5231        |
| Man.1         | 2164.82 | 1  | 30.6517 | 9.367e-06 *** |
| Residuals     | 1765.67 | 25 |         |               |

---

Signif. codes: 0 '\*\*\*' 0.001 '\*\*' 0.01 '\*' 0.05 '.' 0.1 ' ' 1

```
> #####ANCOVA#####
+ TempDF <- primary_data
+ quartz(width=7, height=7); par(lwd=1, las=1, family="sans", cex=1, mgp=
+ scatterplot(Man.3 ~ Man.1 | factor(Group), reg.line=lm, smooth=FALSE, s
+ by.groups=TRUE, data=TempDF)
+ cat(gettext(domain="R-RcmdrPlugin.EZR",
+ "P value for interaction between grouping variable and covariate is")
+ ")
+ ANCOVA not performed due to significant interaction between grouping va
```

Error: <text>:9:8: unexpected symbol

8: ")

9: ANCOVA not

^

```
> #####Two-sample t-test#####
> group.names <- NULL
> group.means <- NULL
> group.sds <- NULL
> group.p <- NULL
> res <- NULL
> (res <- t.test(Man.3~factor(Group), alternative='two.sided', conf.level
+ var.equal=FALSE, data=primary_data))
```

## welch Two Sample t-test

data: Man.3 by factor(Group)

t = 0.070068, df = 21.401, p-value = 0.9448

alternative hypothesis: true difference in means is not equal to 0

95 percent confidence interval:

-5.558782 5.946879

sample estimates:

mean in group A mean in group B

8.725672

8.531623

```
> quartz(width=7, height=7); par(lwd=1, las=1, family="sans", cex=1, mgp=
> boxplot(Man.3~ factor(Group), ylab="Man.3", xlab="Group", data=primary_
```



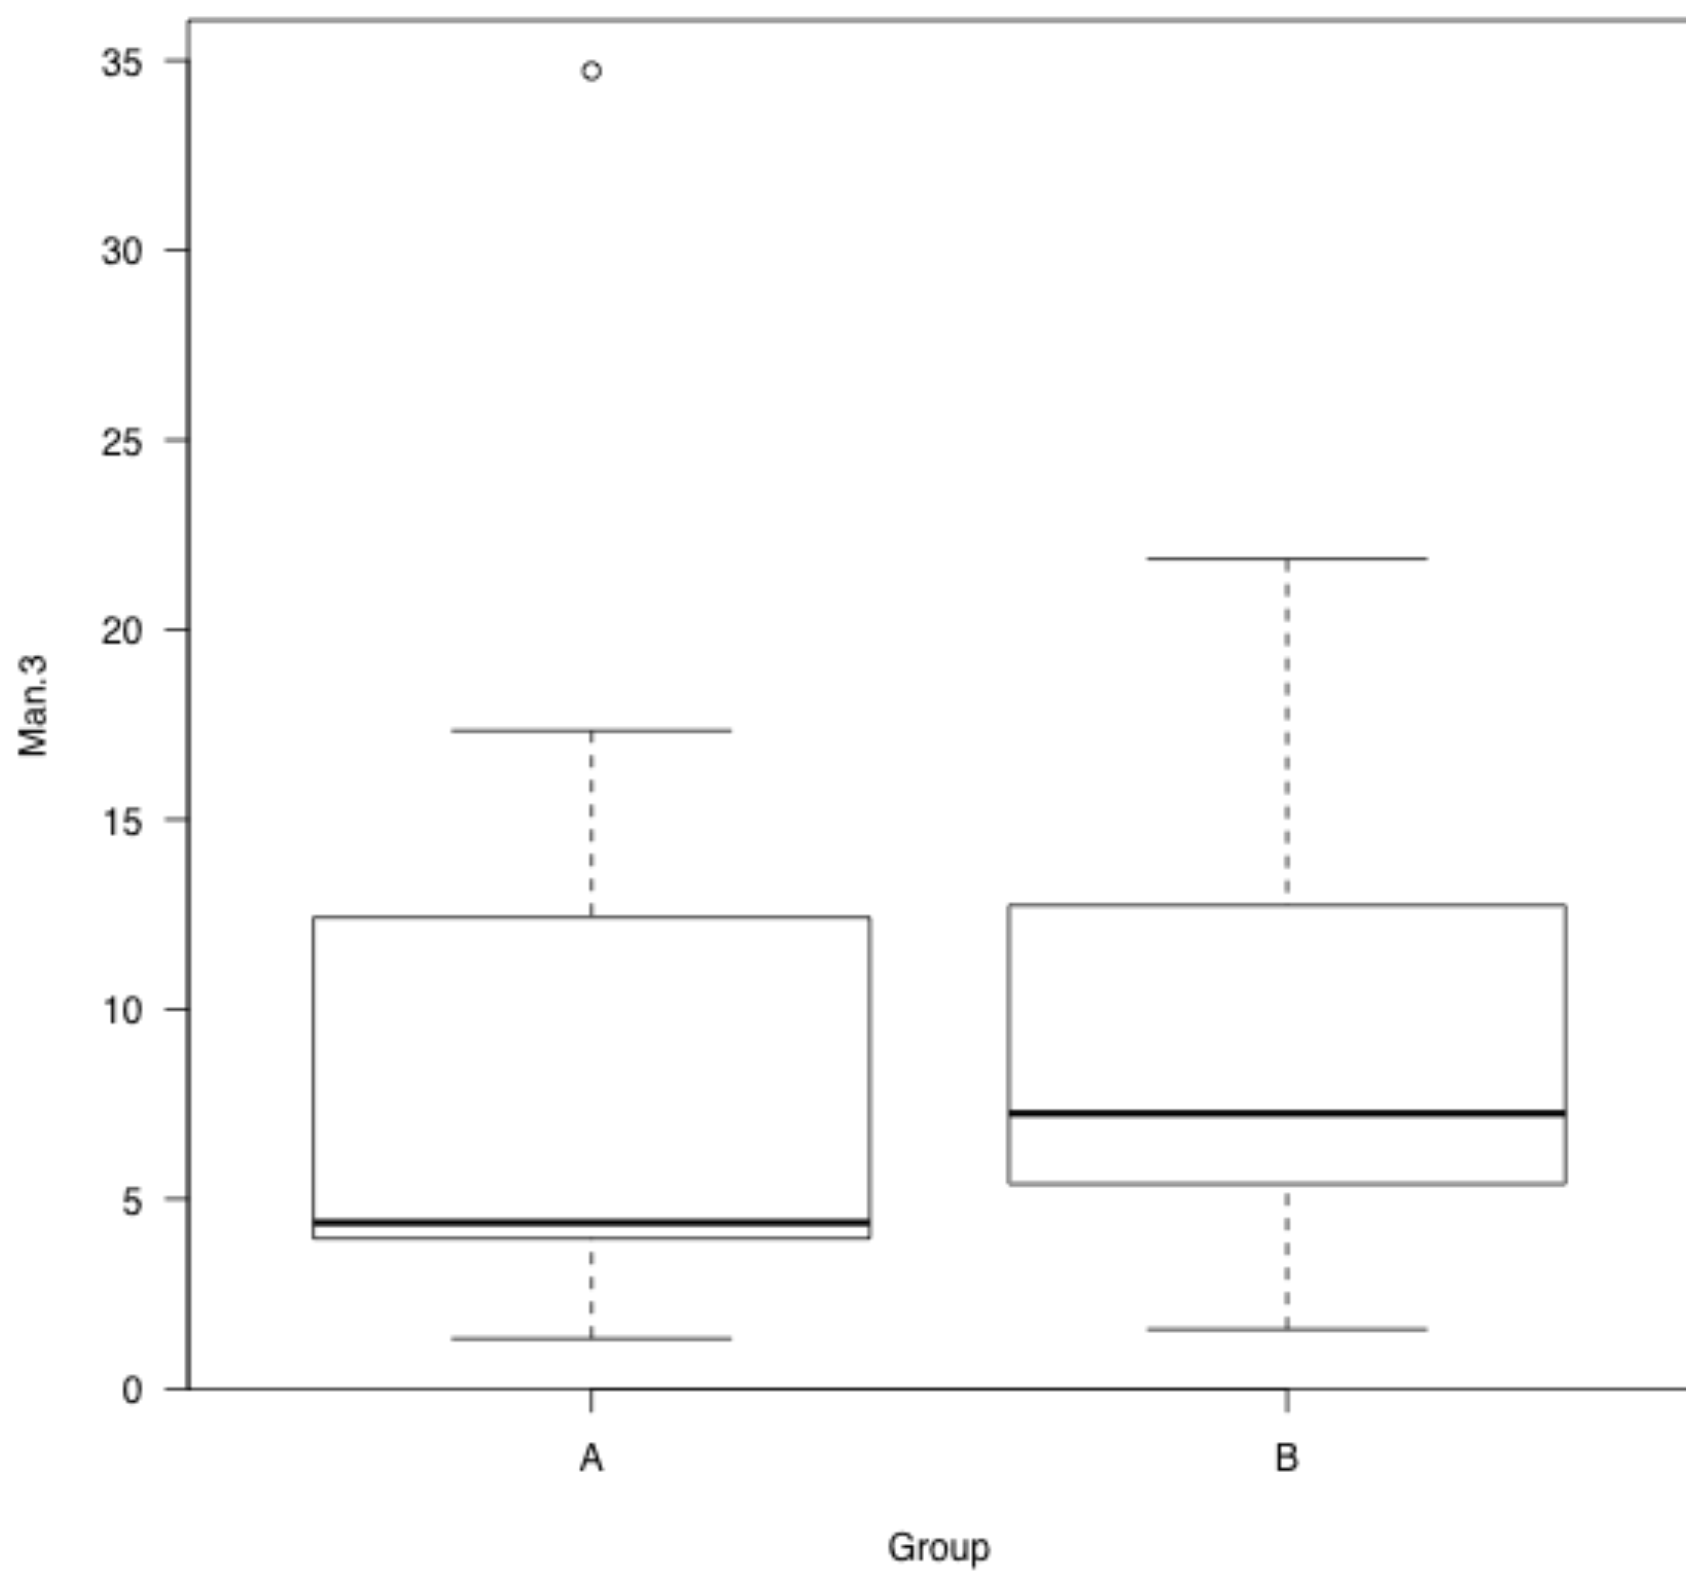

```

> bar.means <- tapply(primary_data$Man.3, factor(primary_data$Group), mea
> bar.sds <- tapply(primary_data$Man.3, factor(primary_data$Group), sd, n
> group.names <- c(group.names, "Group=A")
> group.means <- c(group.means, bar.means[1])
> group.sds <- c(group.sds, bar.sds[1])
> group.p <- c(group.p, signif(res$p.value,digits=3))
> group.names <- c(group.names, "Group=B")
> group.means <- c(group.means, bar.means[2])
> group.sds <- c(group.sds, bar.sds[2])
> group.p <- c(group.p, "")
> summary.ttest <- NULL
> summary.ttest <- data.frame(mean=group.means, sd=group.sds, p.value=gro
> rownames(summary.ttest) <- group.names
> colnames(summary.ttest) <- gettext(domain="R-RcmdrPlugin.EZR",colnames(
> summary.ttest

```

|         | mean     | sd       | p.value |
|---------|----------|----------|---------|
| Group=A | 8.725672 | 8.864379 | 0.945   |
| Group=B | 8.531623 | 5.366668 |         |

```

> #####Two-sample t-test#####
> group.names <- NULL
> group.means <- NULL
> group.sds <- NULL
> group.p <- NULL
> res <- NULL
> (res <- t.test(EAA1~factor(Group), alternative='two.sided', conf.level=
+ data=primary_data))

```

### Welch Two Sample t-test

```

data: EAA1 by factor(Group)
t = -1.5893, df = 22.571, p-value = 0.1259
alternative hypothesis: true difference in means is not equal to 0
95 percent confidence interval:
 -0.14969488  0.01969488
sample estimates:
mean in group A mean in group B
      0.1307143      0.1957143

```

```

> quartz(width=7, height=7); par(lwd=1, las=1, family="sans", cex=1, mgp=
> boxplot(EAA1~ factor(Group), ylab="EAA1", xlab="Group", data=primary_da

```

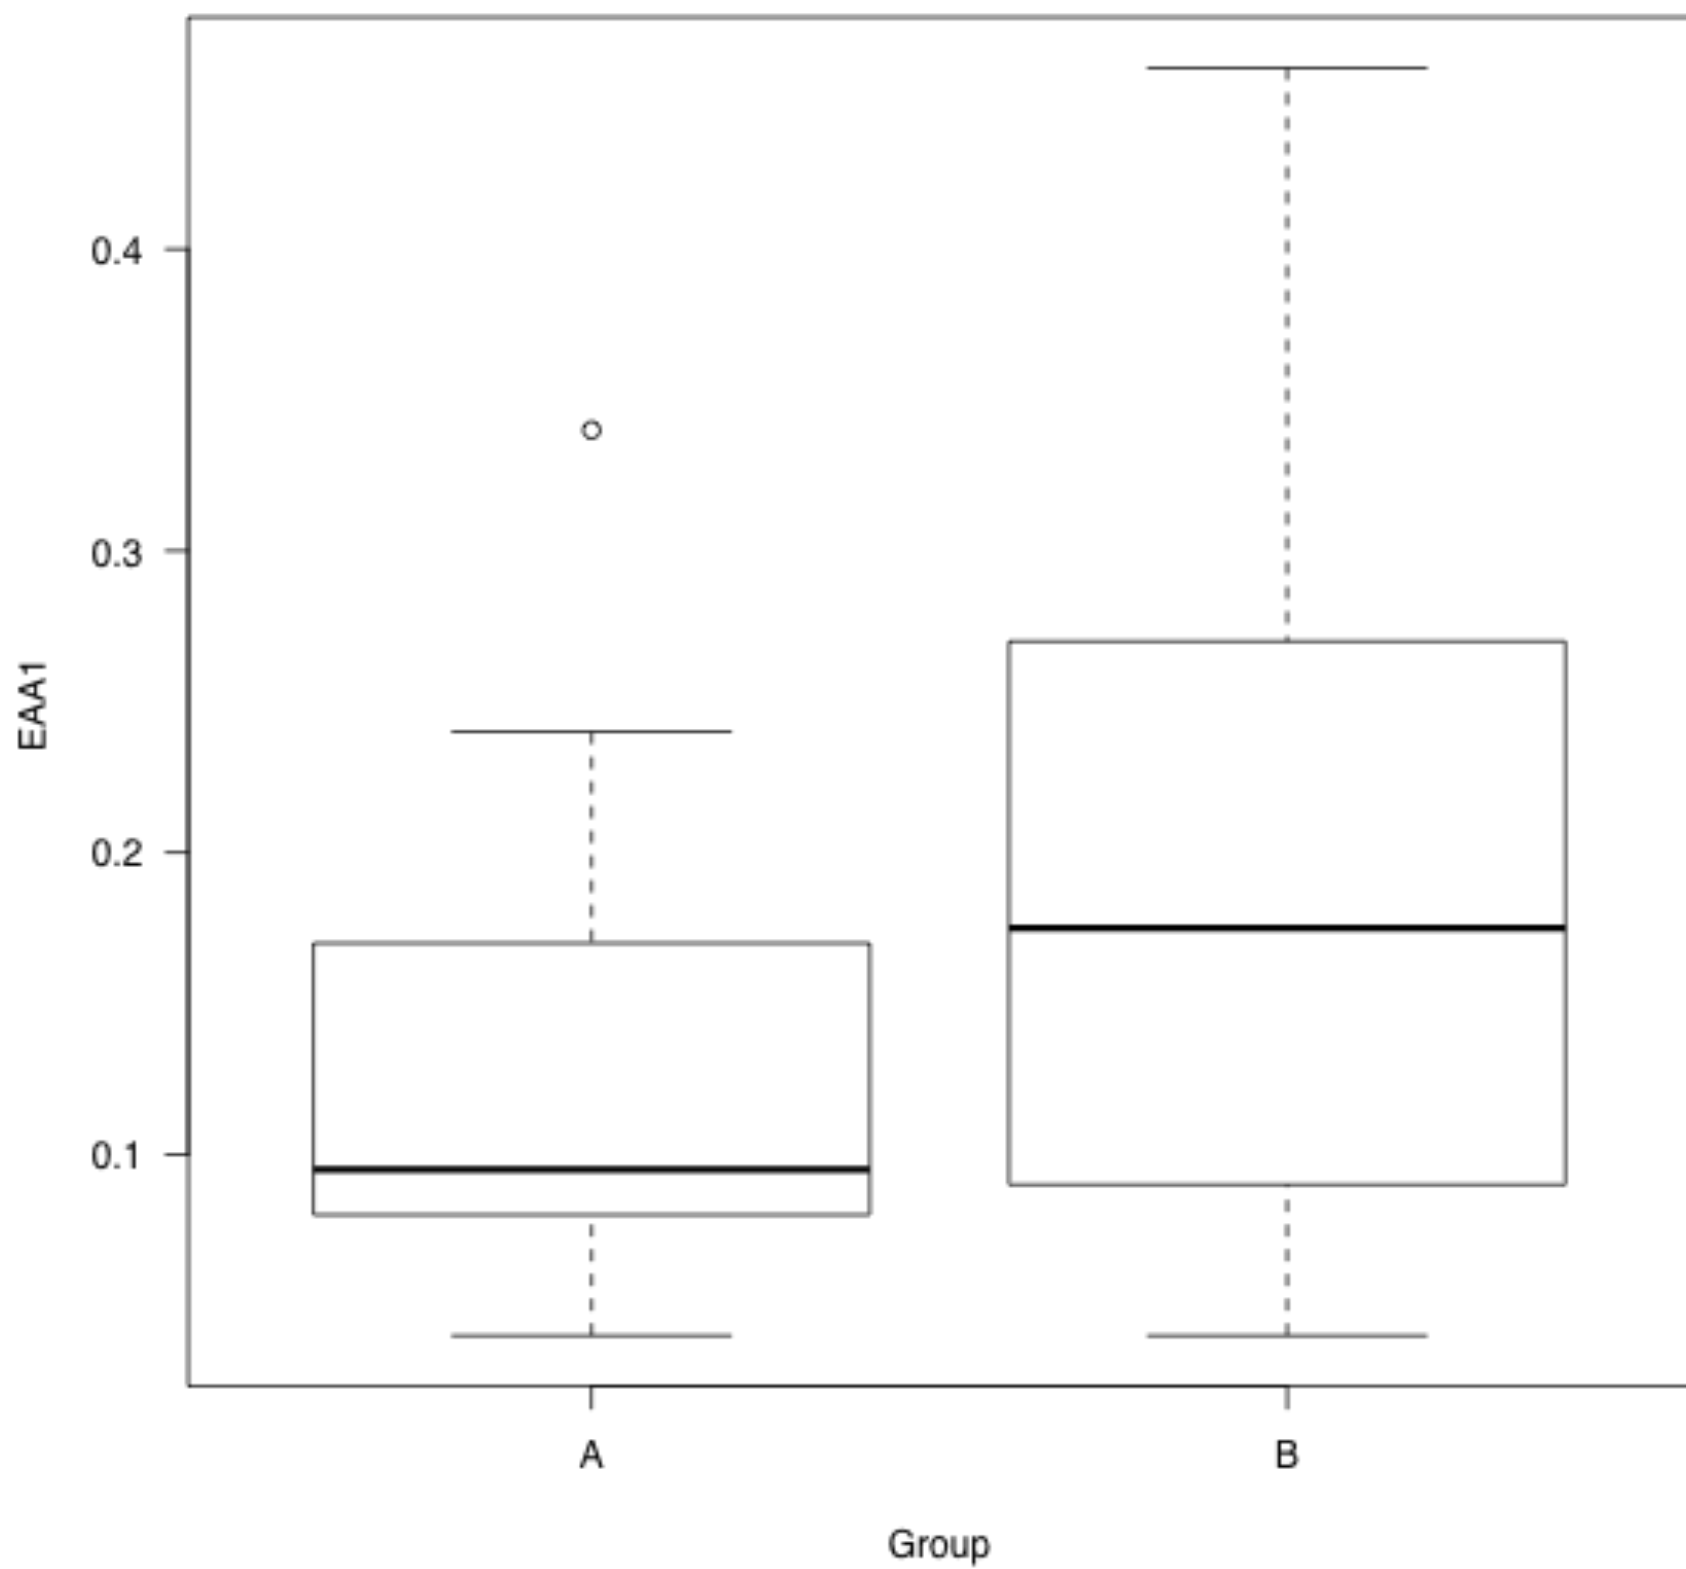

```

> bar.means <- tapply(primary_data$EAA1, factor(primary_data$Group), mean)
> bar.sds <- tapply(primary_data$EAA1, factor(primary_data$Group), sd, na.rm=TRUE)
> group.names <- c(group.names, "Group=A")
> group.means <- c(group.means, bar.means[1])
> group.sds <- c(group.sds, bar.sds[1])
> group.p <- c(group.p, signif(res$p.value,digits=3))
> group.names <- c(group.names, "Group=B")
> group.means <- c(group.means, bar.means[2])
> group.sds <- c(group.sds, bar.sds[2])
> group.p <- c(group.p, "")
> summary.ttest <- NULL
> summary.ttest <- data.frame(mean=group.means, sd=group.sds, p.value=group.p)
> rownames(summary.ttest) <- group.names
> colnames(summary.ttest) <- gettext(domain="R-RcmdrPlugin.EZR",colnames(summary.ttest))
> summary.ttest

```

|         | mean      | sd         | p.value |
|---------|-----------|------------|---------|
| Group=A | 0.1307143 | 0.08453168 | 0.126   |
| Group=B | 0.1957143 | 0.12756382 |         |

```

> #####ANCOVA#####
> TempDF <- primary_data
> quartz(width=7, height=7); par(lwd=1, las=1, family="sans", cex=1, mgp=c(0,0,0))
> scatterplot(EAA2 ~ EAA1 | factor(Group), reg.line=lm, smooth=FALSE, spr=1,
+ by.groups=TRUE, data=TempDF)

```

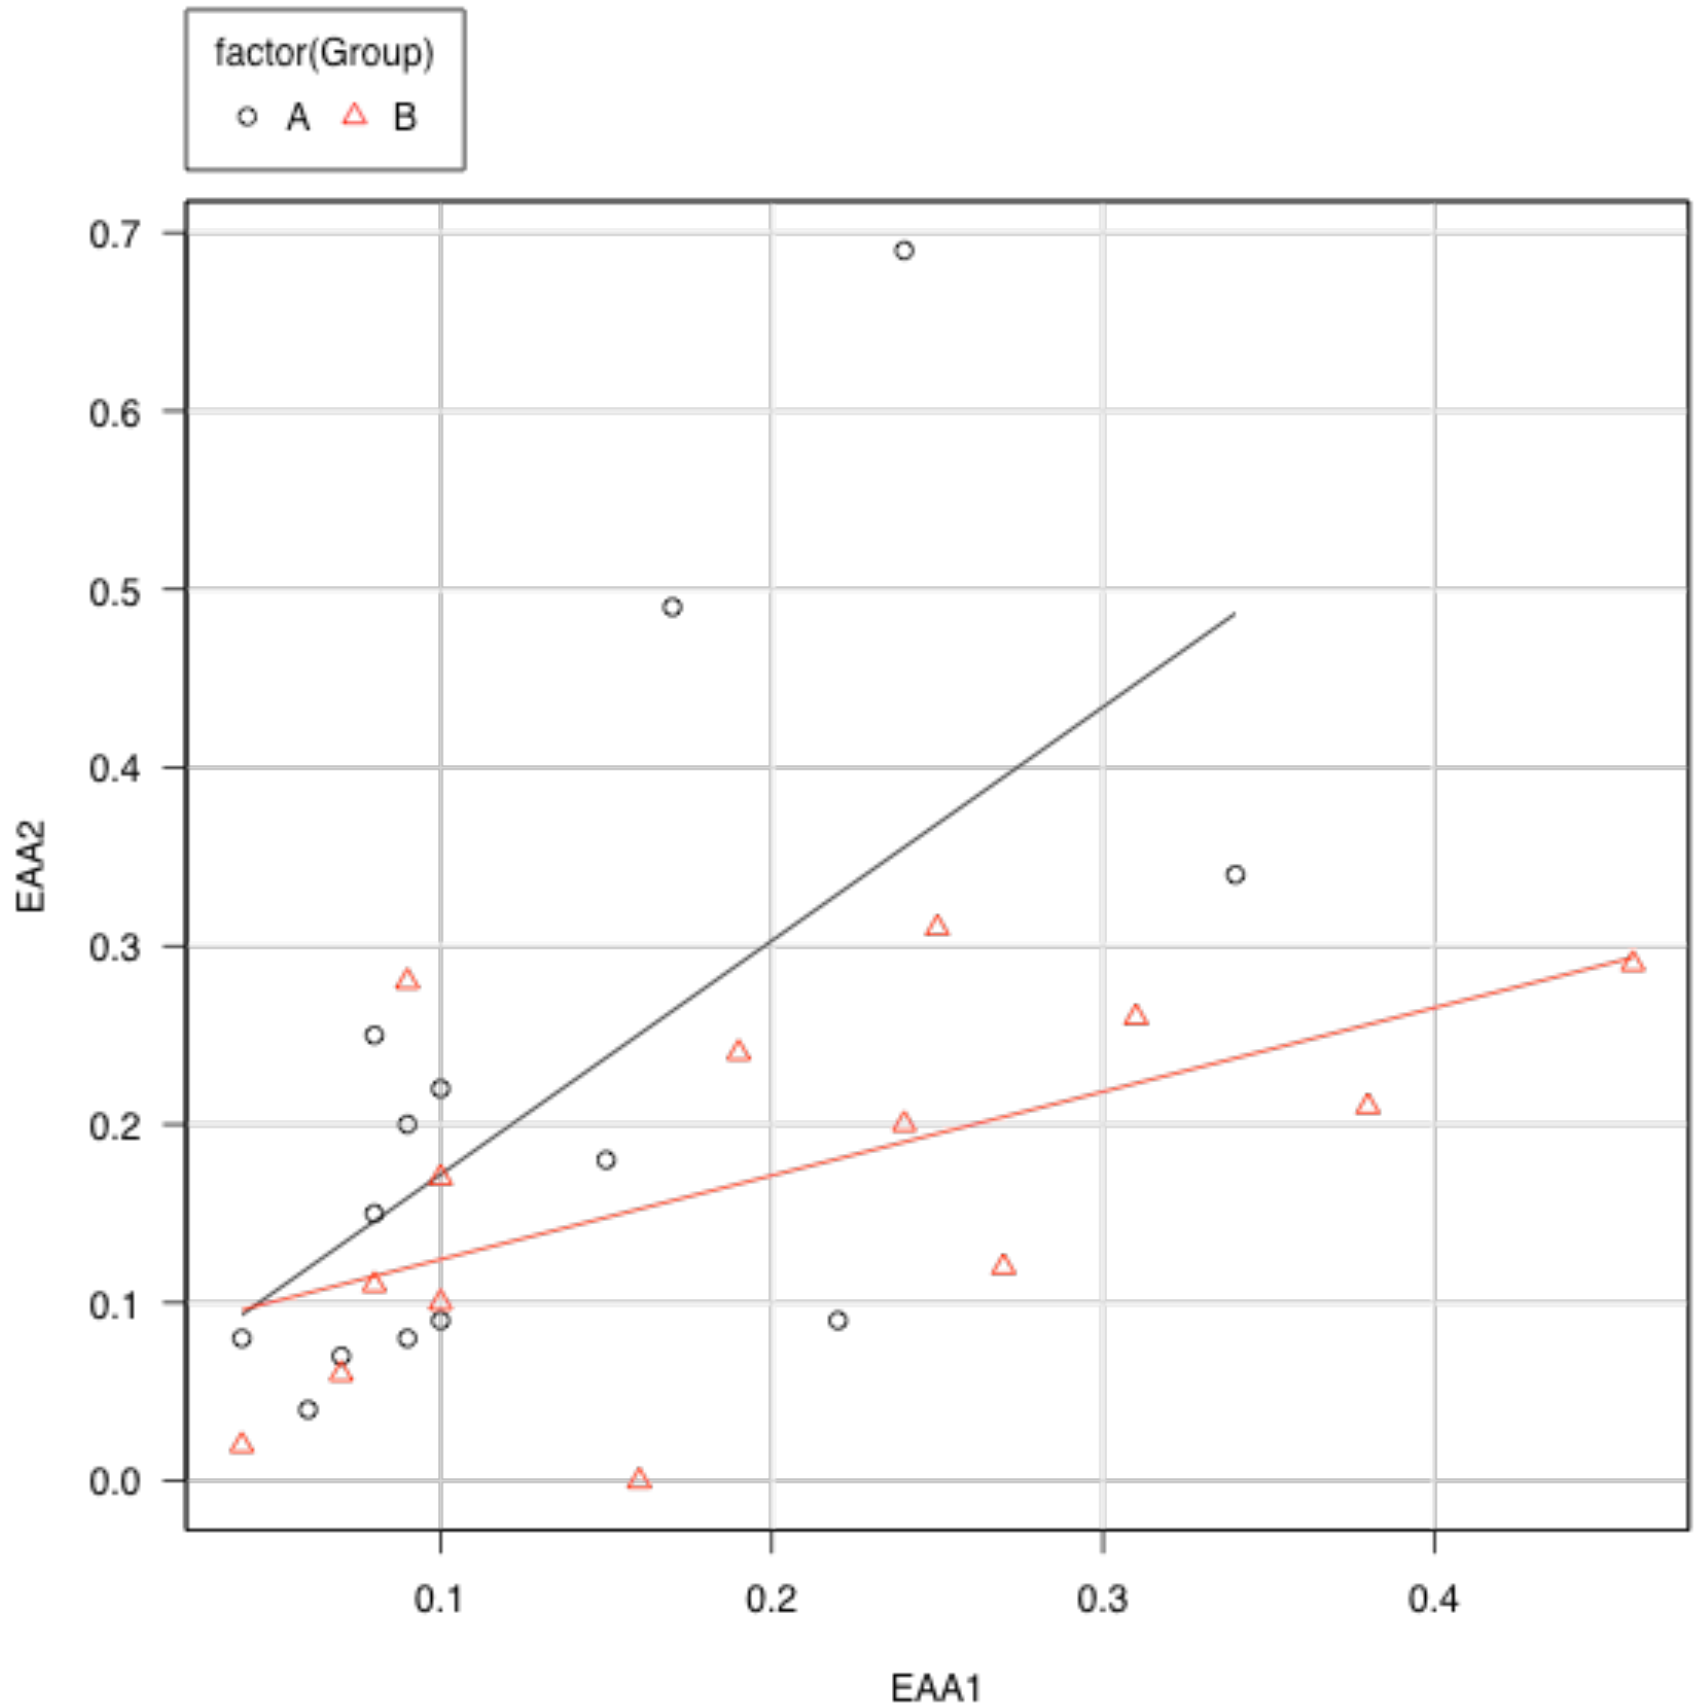

```
> cat(gettext(domain="R-RcmdrPlugin.EZR",
+ "P value for interaction between grouping variable and covariate is")
+ ")")
```

P value for interaction between grouping variable and covariate is 0.0994

```
> AnovaModel.7 <- AnovaModel.7 <- lm(EAA2 ~ 1 + factor(Group) + EAA1, dat
+ na.action=na.omit)
> Anova(AnovaModel.7, type="III")
```

## Anova Table (Type III tests)

Response: EAA2

|               | Sum Sq  | Df | F value | Pr(>F)   |    |
|---------------|---------|----|---------|----------|----|
| (Intercept)   | 0.10760 | 1  | 6.4299  | 0.017848 | *  |
| factor(Group) | 0.05179 | 1  | 3.0947  | 0.090785 | .  |
| EAA1          | 0.16077 | 1  | 9.6075  | 0.004747 | ** |
| Residuals     | 0.41835 | 25 |         |          |    |

---

Signif. codes: 0 '\*\*\*' 0.001 '\*\*' 0.01 '\*' 0.05 '.' 0.1 ' ' 1

```
> #####ANCOVA#####
```

```
> TempDF <- primary_data
```

```
> quartz(width=7, height=7); par(lwd=1, las=1, family="sans", cex=1, mgp=
```

```
> scatterplot(EAA3 ~ EAA1 | factor(Group), reg.line=lm, smooth=FALSE, spr
```

```
+ by.groups=TRUE, data=TempDF)
```

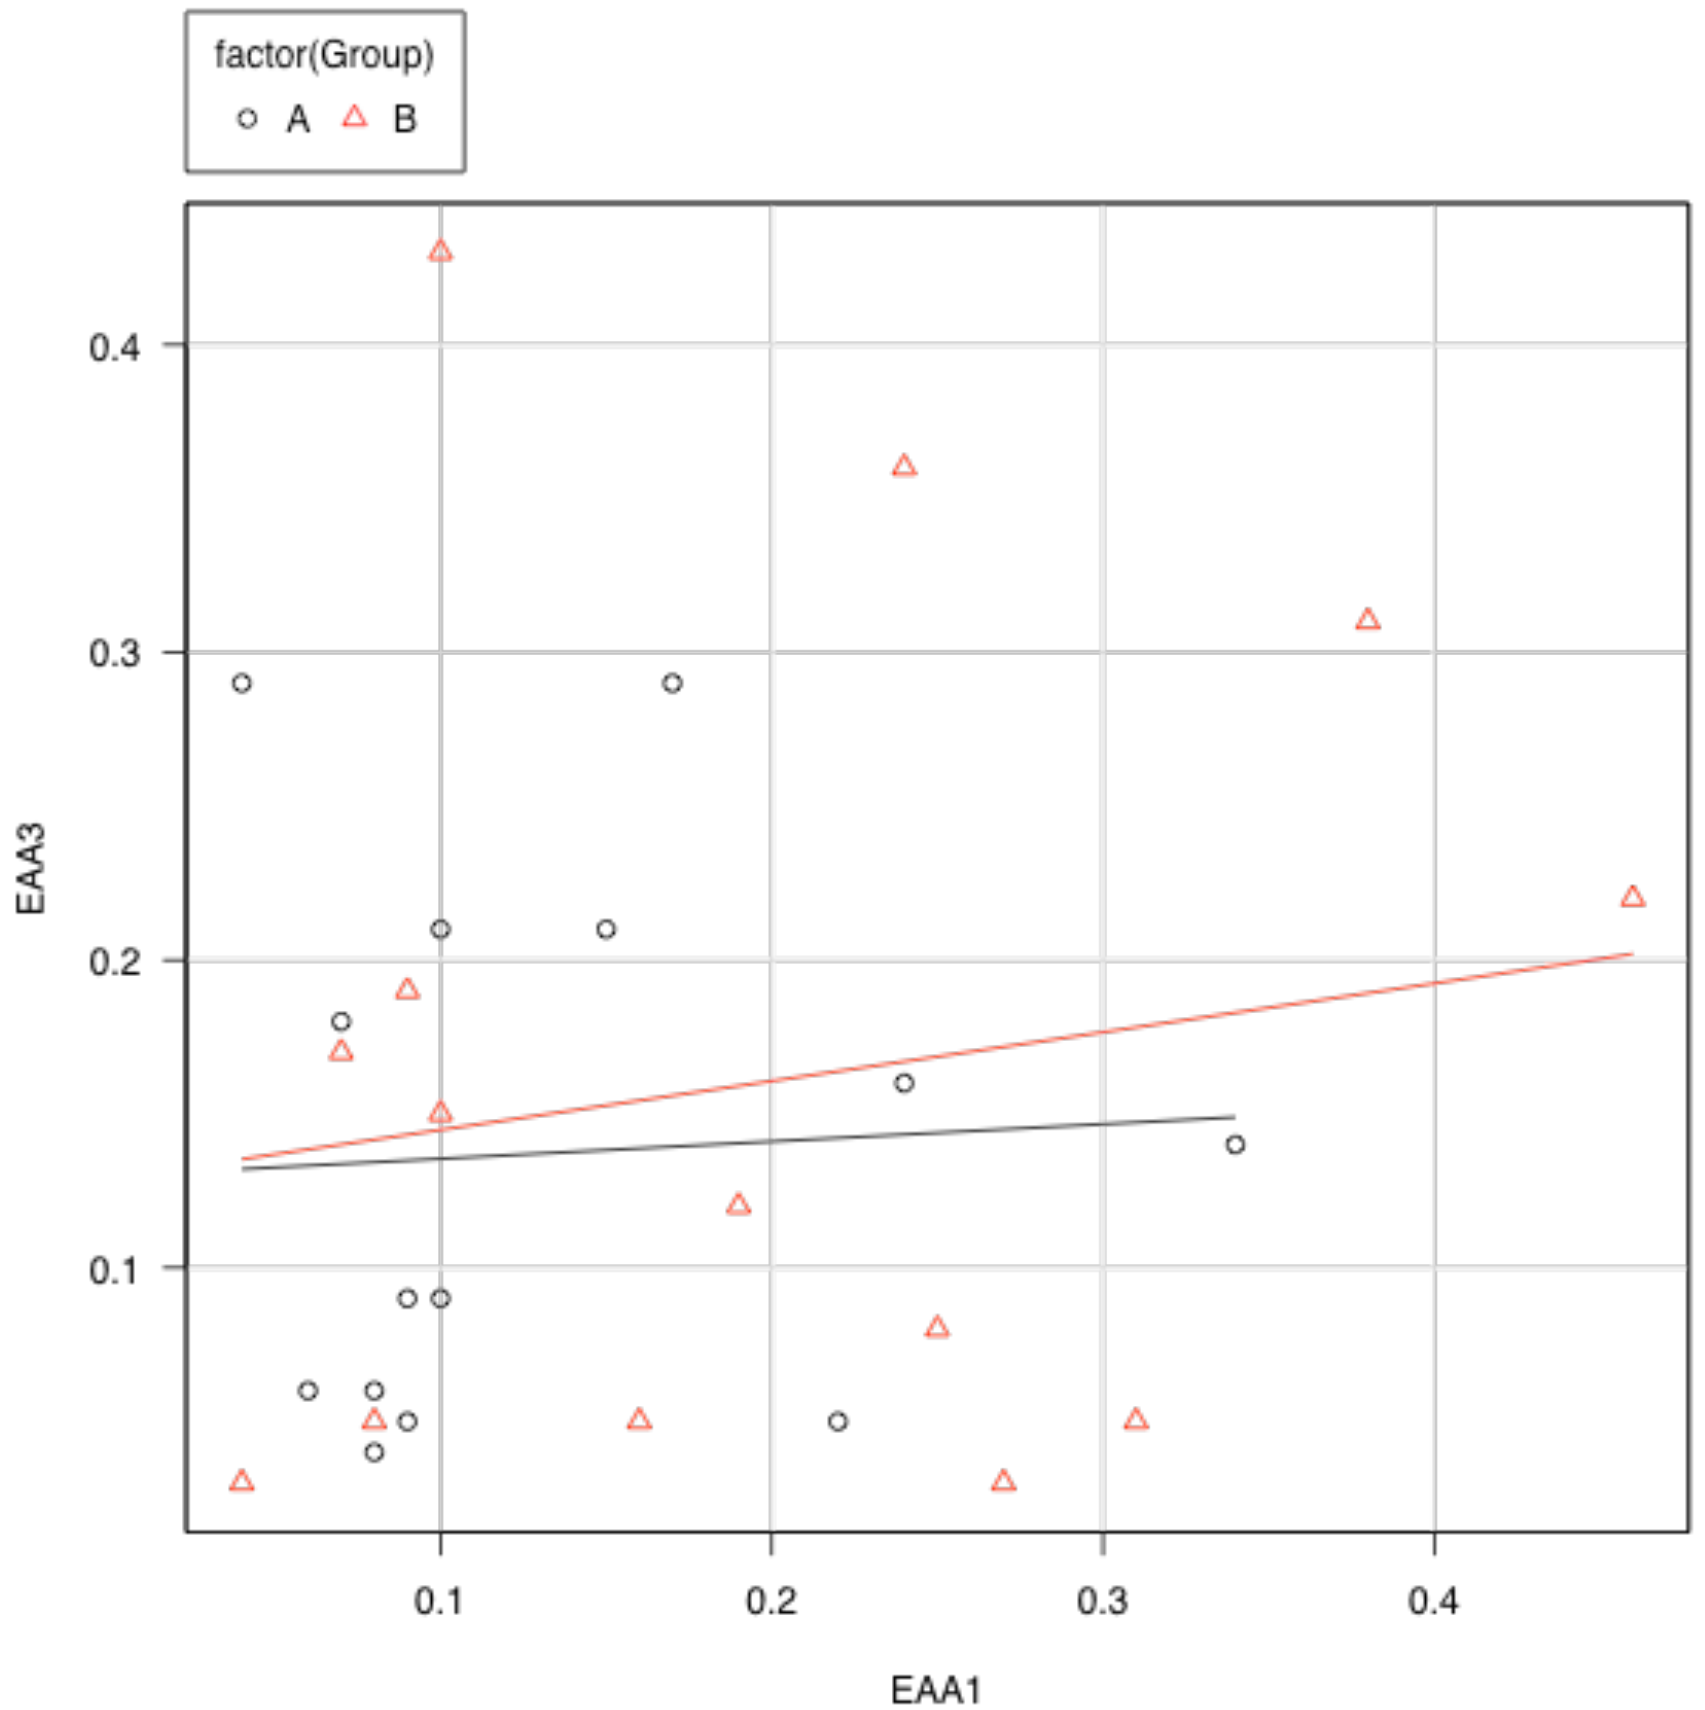

```
> cat(gettext(domain="R-RcmdrPlugin.EZR",
+ "P value for interaction between grouping variable and covariate is")
+ ")
```

P value for interaction between grouping variable and covariate is 0.822

```
> AnovaModel.8 <- AnovaModel.8 <- lm(EAA3 ~ 1 + factor(Group) + EAA1, dat
+ na.action=na.omit)
> Anova(AnovaModel.8, type="III")
```

## Anova Table (Type III tests)

Response: EAA3

|               | Sum Sq   | Df | F value | Pr(>F)   |    |
|---------------|----------|----|---------|----------|----|
| (Intercept)   | 0.113783 | 1  | 9.0611  | 0.005893 | ** |
| factor(Group) | 0.001354 | 1  | 0.1078  | 0.745383 |    |
| EAA1          | 0.004952 | 1  | 0.3944  | 0.535704 |    |
| Residuals     | 0.313933 | 25 |         |          |    |

---

Signif. codes: 0 '\*\*\*' 0.001 '\*\*' 0.01 '\*' 0.05 '.' 0.1 ' ' 1

```
> #####Read Data From Text File#####
```

```
> AE <- read.table("/Users/takakato222/Desktop/lubiprostone adverse event  
+ sep=",", na.strings=c("", "NA"), dec=".", fill=TRUE, quote="\\"", stri  
> AE <- read.table("/Users/takakato222/Desktop/lubiprostone adverse event  
+ sep=",", na.strings=c("", "NA"), dec=".", fill=TRUE, quote="\\"", stri
```

```
> library(abind, pos=16)
```

```
> #####Create two-way table and compare two proportions (Fisher's exact t
```

```
> Fisher.summary.table <- NULL  
> .Table <- NULL  
> .Table <- xtabs(~AE+Group, data=AE)  
> .Table
```

|    | Group |    |
|----|-------|----|
| AE | A     | B  |
| 0  | 11    | 15 |
| 1  | 4     | 0  |

```
> rowPercents(.Table) # Row Percentages
```

|    | Group |      | Total | Count |
|----|-------|------|-------|-------|
| AE | A     | B    |       |       |
| 0  | 42.3  | 57.7 | 100   | 26    |
| 1  | 100.0 | 0.0  | 100   | 4     |

```
> fisher.test(.Table)
```



## Fisher's Exact Test for Count Data

```
data: .Table
p-value = 0.09962
alternative hypothesis: true odds ratio is not equal to 1
95 percent confidence interval:
 0.000000 1.379265
sample estimates:
odds ratio
      0
```

```
> res <- NULL
> res <- fisher.test(.Table)
> Fisher.summary.table <- rbind(Fisher.summary.table,
+ summary.table.twoway(table=.Table, res=res))
> colnames(Fisher.summary.table)[length(Fisher.summary.table)] <-
+ gettext(domain="R-RcmdrPlugin.EZR",
+ colnames(Fisher.summary.table)[length(Fisher.summary.table)])
> Fisher.summary.table
```

|      | Group=A | Group=B | Fisher.p.value |
|------|---------|---------|----------------|
| AE=0 | 11      | 15      | 0.0996         |
| AE=1 | 4       | 0       |                |
