# Supplementary material for: Lubiprostone improves intestinal permeability in humans, a novel therapy for the leaky gut: A prospective randomized pilot study in healthy volunteers
Source: PubMed Central journal article supplement (PMC5391961; doi:10.1371/journal.pone.0175626), 2017-04-14
Supplement: pone.0175626.s005.pdf [file pone.0175626.s005.pdf]

# Replace with Main Title

Your Name

2017-02-23

```
> primary_data <-  
+   readXL("C:/Users/Takayuki Kato/iCloudDrive/アボット研究/PLOS ONE 投  
+   rownames=FALSE, header=TRUE, na="", sheet="primary data.csv",  
+   stringsAsFactors=TRUE)
```

```
DEFINEDNAME: 21 00 00 01 0b 00 00 00 01 00 00 00 00 00 0d 3b 00 00  
DEFINEDNAME: 21 00 00 01 0b 00 00 00 01 00 00 00 00 00 0d 3b 00 00  
DEFINEDNAME: 21 00 00 01 0b 00 00 00 01 00 00 00 00 00 0d 3b 00 00  
DEFINEDNAME: 21 00 00 01 0b 00 00 00 01 00 00 00 00 00 0d 3b 00 00  
DEFINEDNAME: 21 00 00 01 0b 00 00 00 01 00 00 00 00 00 0d 3b 00 00
```

```
> #####Two-sample t-test#####  
> group.names <- NULL  
> group.means <- NULL  
> group.sds <- NULL  
> group.p <- NULL  
> res <- NULL  
> (res <- t.test(LMR2~factor(Group), alternative='two.sided', conf.level  
+   var.equal=FALSE, data=primary_data))
```

welch Two Sample t-test

```
data: LMR2 by factor(Group)  
t = -0.86721, df = 17.324, p-value = 0.3977  
alternative hypothesis: true difference in means is not equal to 0  
95 percent confidence interval:  
-0.03800393 0.01584036  
sample estimates:  
mean in group A mean in group B  
0.02400967 0.03509145
```

```
> windows(width=7, height=7); par(lwd=1, las=1, family="sans", cex=1,  
+ 0)  
> boxplot(LMR2~ factor(Group), ylab="LMR2", xlab="Group", data=primar
```

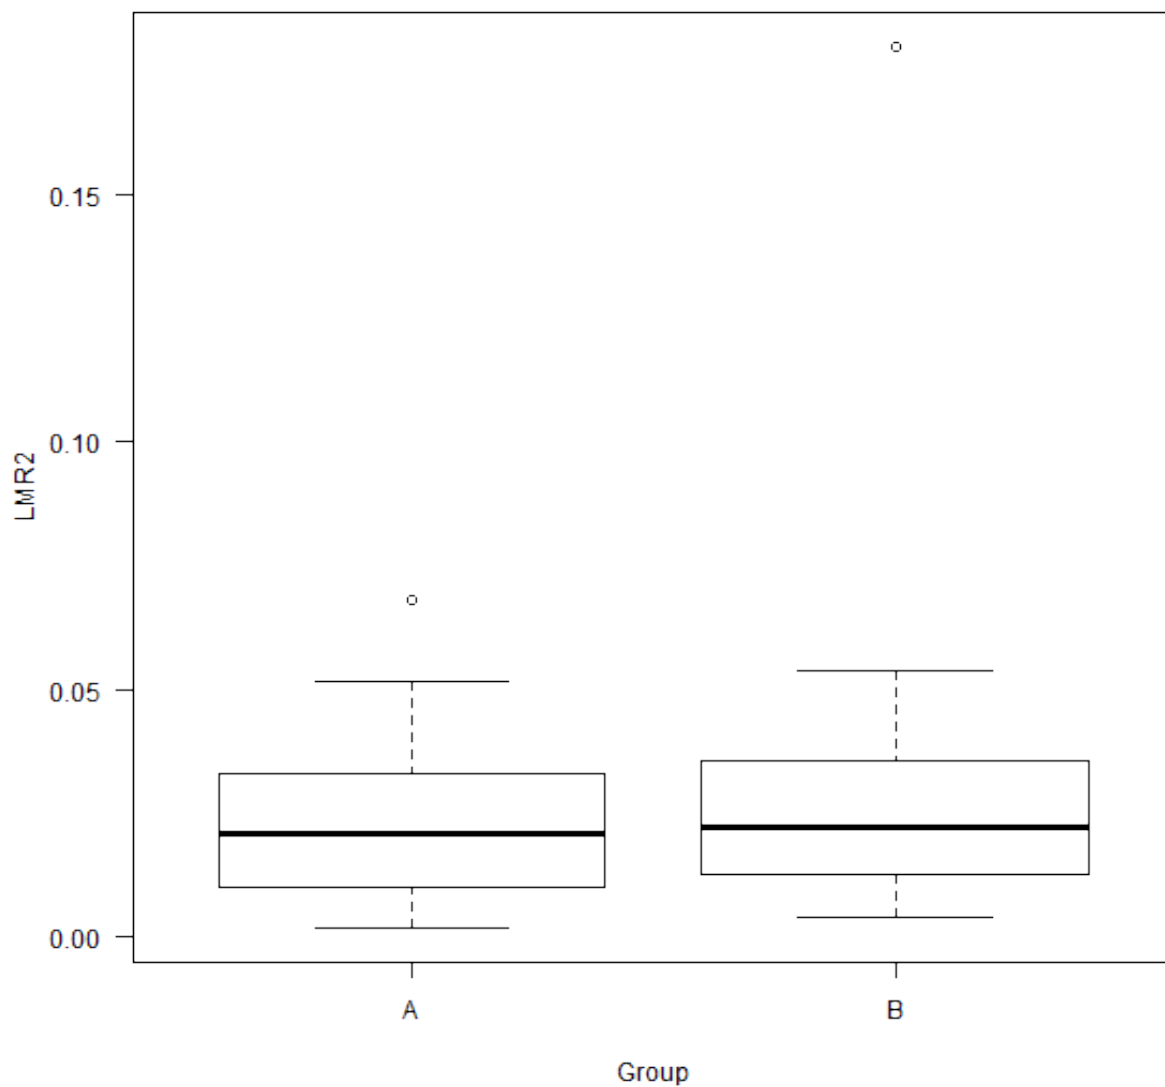

```

> bar.means <- tapply(primary_data$LMR2, factor(primary_data$Group),
+   na.rm=TRUE)
> bar.sds <- tapply(primary_data$LMR2, factor(primary_data$Group), sc
> group.names <- c(group.names, "Group=A")
> group.means <- c(group.means, bar.means[1])
> group.sds <- c(group.sds, bar.sds[1])
> group.p <- c(group.p, signif(res$p.value,digits=3))
> group.names <- c(group.names, "Group=B")
> group.means <- c(group.means, bar.means[2])
> group.sds <- c(group.sds, bar.sds[2])
> group.p <- c(group.p, "")
> summary.ttest <- NULL
> summary.ttest <- data.frame(mean=group.means, sd=group.sds, p.value
> rownames(summary.ttest) <- group.names
> colnames(summary.ttest) <- gettextRcmdr(colnames(summary.ttest))
> summary.ttest

```

|         | mean       | sd         | p.value |
|---------|------------|------------|---------|
| Group=A | 0.02400967 | 0.01827999 | 0.398   |
| Group=B | 0.03509145 | 0.04418084 |         |

```

> #####Two-sample t-test#####
> group.names <- NULL
> group.means <- NULL
> group.sds <- NULL
> group.p <- NULL
> res <- NULL
> (res <- t.test(LMR3~factor(Group), alternative='two.sided', conf.level
+   var.equal=FALSE, data=primary_data))

```

```

welch Two Sample t-test

data:  LMR3 by factor(Group)
t = -2.1496, df = 15.686, p-value = 0.04755
alternative hypothesis: true difference in means is not equal to 0
95 percent confidence interval:
 -0.0220759132 -0.0001358381
sample estimates:
mean in group A mean in group B
 0.01715622      0.02826209

```

```
> windows(width=7, height=7); par(lwd=1, las=1, family="sans", cex=1,  
+ 0)  
> boxplot(LMR3~ factor(Group), ylab="LMR3", xlab="Group", data=primar
```

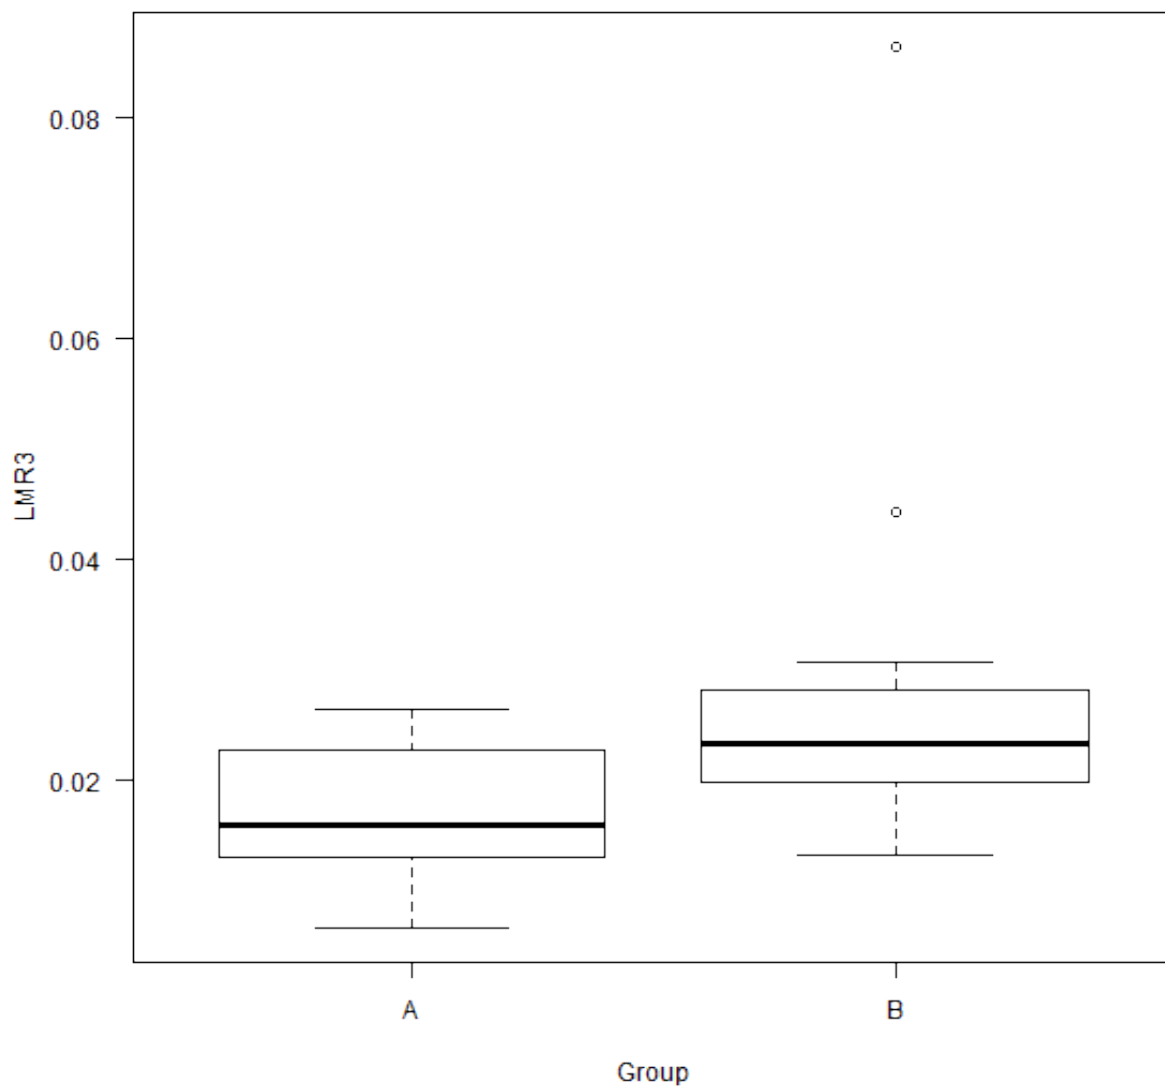

```

> bar.means <- tapply(primary_data$LMR3, factor(primary_data$Group),
+   na.rm=TRUE)
> bar.sds <- tapply(primary_data$LMR3, factor(primary_data$Group), sc
> group.names <- c(group.names, "Group=A")
> group.means <- c(group.means, bar.means[1])
> group.sds <- c(group.sds, bar.sds[1])
> group.p <- c(group.p, signif(res$p.value,digits=3))
> group.names <- c(group.names, "Group=B")
> group.means <- c(group.means, bar.means[2])
> group.sds <- c(group.sds, bar.sds[2])
> group.p <- c(group.p, "")
> summary.ttest <- NULL
> summary.ttest <- data.frame(mean=group.means, sd=group.sds, p.value
> rownames(summary.ttest) <- group.names
> colnames(summary.ttest) <- gettextRcmdr(colnames(summary.ttest))
> summary.ttest

```

|         | mean       | sd          | p.value |
|---------|------------|-------------|---------|
| Group=A | 0.01715622 | 0.005944537 | 0.0475  |
| Group=B | 0.02826209 | 0.018394052 |         |

```

> #####Two-sample t-test#####
> group.names <- NULL
> group.means <- NULL
> group.sds <- NULL
> group.p <- NULL
> res <- NULL
> (res <- t.test(Man.2~factor(Group), alternative='two.sided', conf.1
+   var.equal=FALSE, data=primary_data))

```

welch Two Sample t-test

```

data: Man.2 by factor(Group)
t = 0.30538, df = 25.999, p-value = 0.7625
alternative hypothesis: true difference in means is not equal to 0
95 percent confidence interval:
-8.133243 10.971555
sample estimates:
mean in group A mean in group B
    9.591020      8.171863

```

```
> windows(width=7, height=7); par(lwd=1, las=1, family="sans", cex=1,  
+ 0)  
> boxplot(Man.2~ factor(Group), ylab="Man.2", xlab="Group", data=prin
```

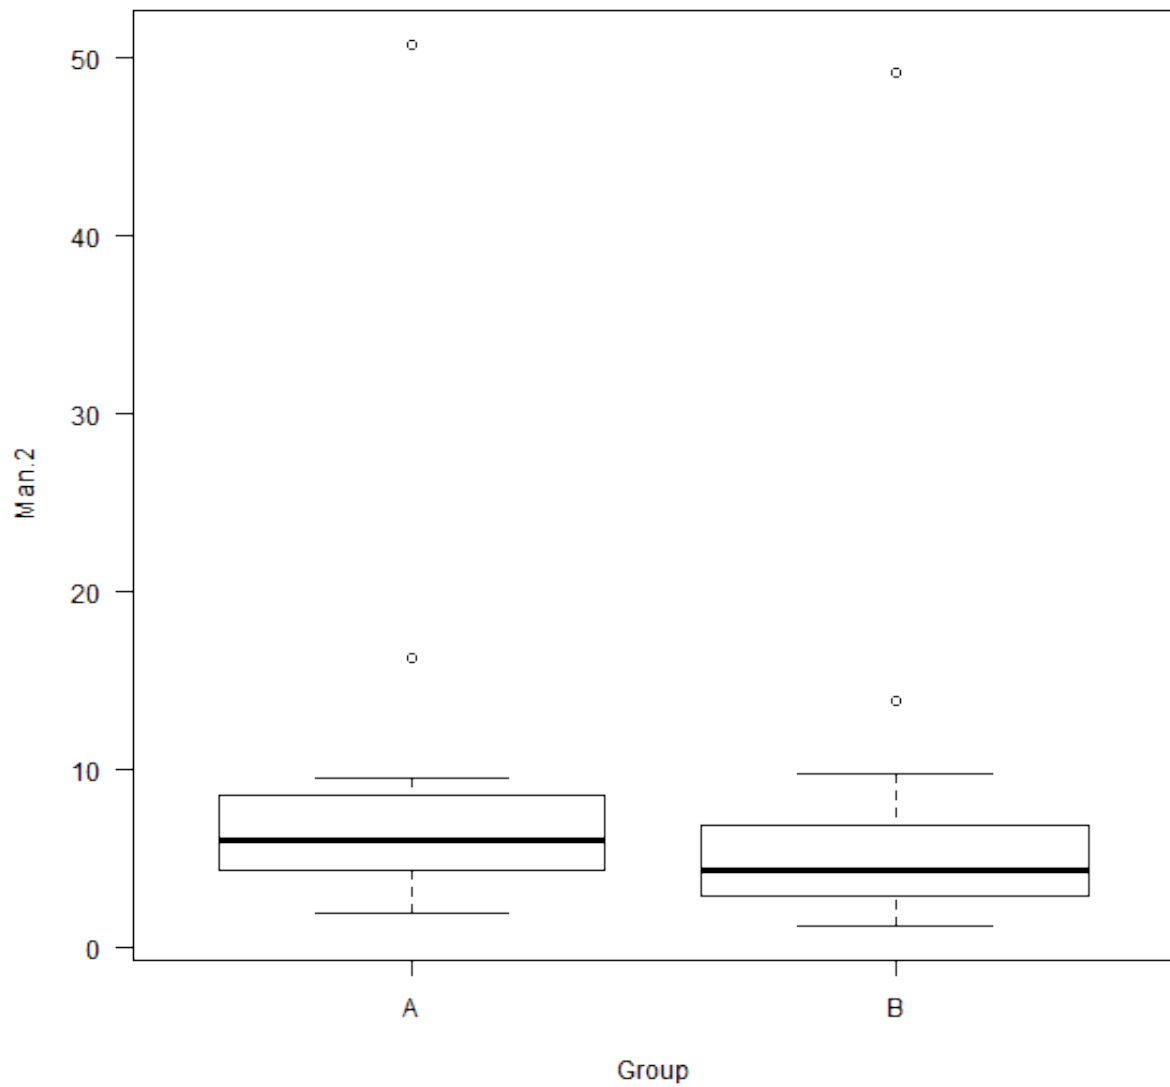

```

> bar.means <- tapply(primary_data$Man.2, factor(primary_data$Group),
+   na.rm=TRUE)
> bar.sds <- tapply(primary_data$Man.2, factor(primary_data$Group), s
> group.names <- c(group.names, "Group=A")
> group.means <- c(group.means, bar.means[1])
> group.sds <- c(group.sds, bar.sds[1])
> group.p <- c(group.p, signif(res$p.value,digits=3))
> group.names <- c(group.names, "Group=B")
> group.means <- c(group.means, bar.means[2])
> group.sds <- c(group.sds, bar.sds[2])
> group.p <- c(group.p, "")
> summary.ttest <- NULL
> summary.ttest <- data.frame(mean=group.means, sd=group.sds, p.value
> rownames(summary.ttest) <- group.names
> colnames(summary.ttest) <- gettextRcmdr(colnames(summary.ttest))
> summary.ttest

```

|         | mean     | sd       | p.value |
|---------|----------|----------|---------|
| Group=A | 9.591020 | 12.33969 | 0.763   |
| Group=B | 8.171863 | 12.25061 |         |

```

> #####Two-sample t-test#####
> group.names <- NULL
> group.means <- NULL
> group.sds <- NULL
> group.p <- NULL
> res <- NULL
> (res <- t.test(EAA2~factor(Group), alternative='two.sided', conf.level
+   var.equal=FALSE, data=primary_data))

```

```

welch Two Sample t-test

data:  EAA2 by factor(Group)
t = 0.75975, df = 20.298, p-value = 0.4561
alternative hypothesis: true difference in means is not equal to 0
95 percent confidence interval:
 -0.07470021  0.16041450
sample estimates:
mean in group A mean in group B
      0.2121429      0.1692857

```

```
> windows(width=7, height=7); par(lwd=1, las=1, family="sans", cex=1,  
+ 0)  
> boxplot(EAA2~ factor(Group), ylab="EAA2", xlab="Group", data=primar
```

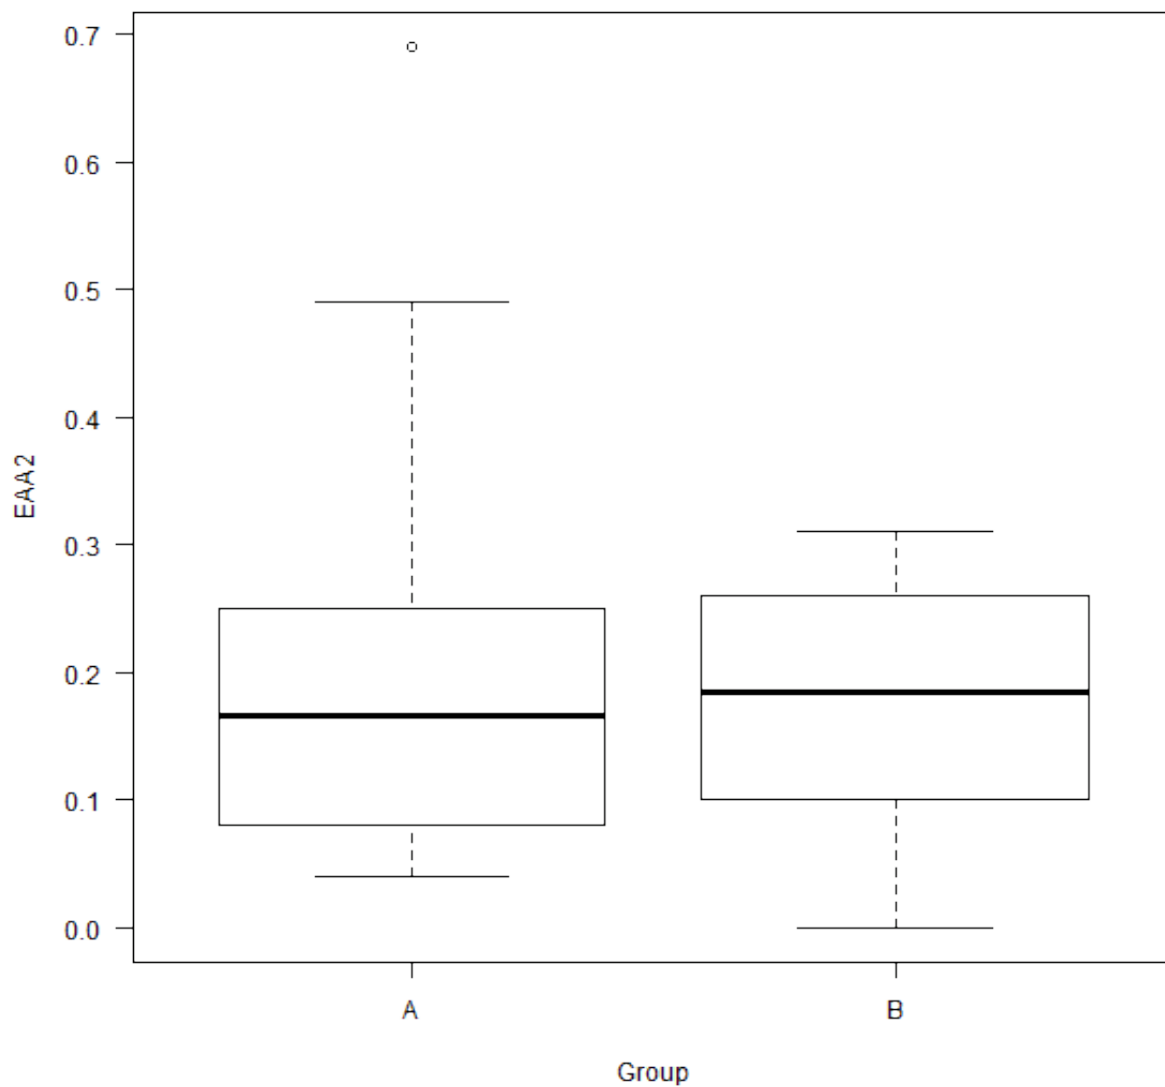



```

> bar.means <- tapply(primary_data$EAA2, factor(primary_data$Group),
+   na.rm=TRUE)
> bar.sds <- tapply(primary_data$EAA2, factor(primary_data$Group), sc
> group.names <- c(group.names, "Group=A")
> group.means <- c(group.means, bar.means[1])
> group.sds <- c(group.sds, bar.sds[1])
> group.p <- c(group.p, signif(res$p.value,digits=3))
> group.names <- c(group.names, "Group=B")
> group.means <- c(group.means, bar.means[2])
> group.sds <- c(group.sds, bar.sds[2])
> group.p <- c(group.p, "")
> summary.ttest <- NULL
> summary.ttest <- data.frame(mean=group.means, sd=group.sds, p.value
> rownames(summary.ttest) <- group.names
> colnames(summary.ttest) <- gettextRcmdr(colnames(summary.ttest))
> summary.ttest

```

|         | mean      | sd        | p.value |
|---------|-----------|-----------|---------|
| Group=A | 0.2121429 | 0.1846068 | 0.456   |
| Group=B | 0.1692857 | 0.1023166 |         |

```

> #####Two-sample t-test#####
> group.names <- NULL
> group.means <- NULL
> group.sds <- NULL
> group.p <- NULL
> res <- NULL
> (res <- t.test(EAA3~factor(Group), alternative='two.sided', conf.level
+   var.equal=FALSE, data=primary_data))

```

```

welch Two Sample t-test

data:  EAA3 by factor(Group)
t = -0.54606, df = 22.891, p-value = 0.5903
alternative hypothesis: true difference in means is not equal to 0
95 percent confidence interval:
 -0.10947045  0.06375616
sample estimates:
mean in group A mean in group B
 0.1371429      0.1600000

```

```
> windows(width=7, height=7); par(lwd=1, las=1, family="sans", cex=1,  
+ 0)  
> boxplot(EAA3~ factor(Group), ylab="EAA3", xlab="Group", data=primar
```

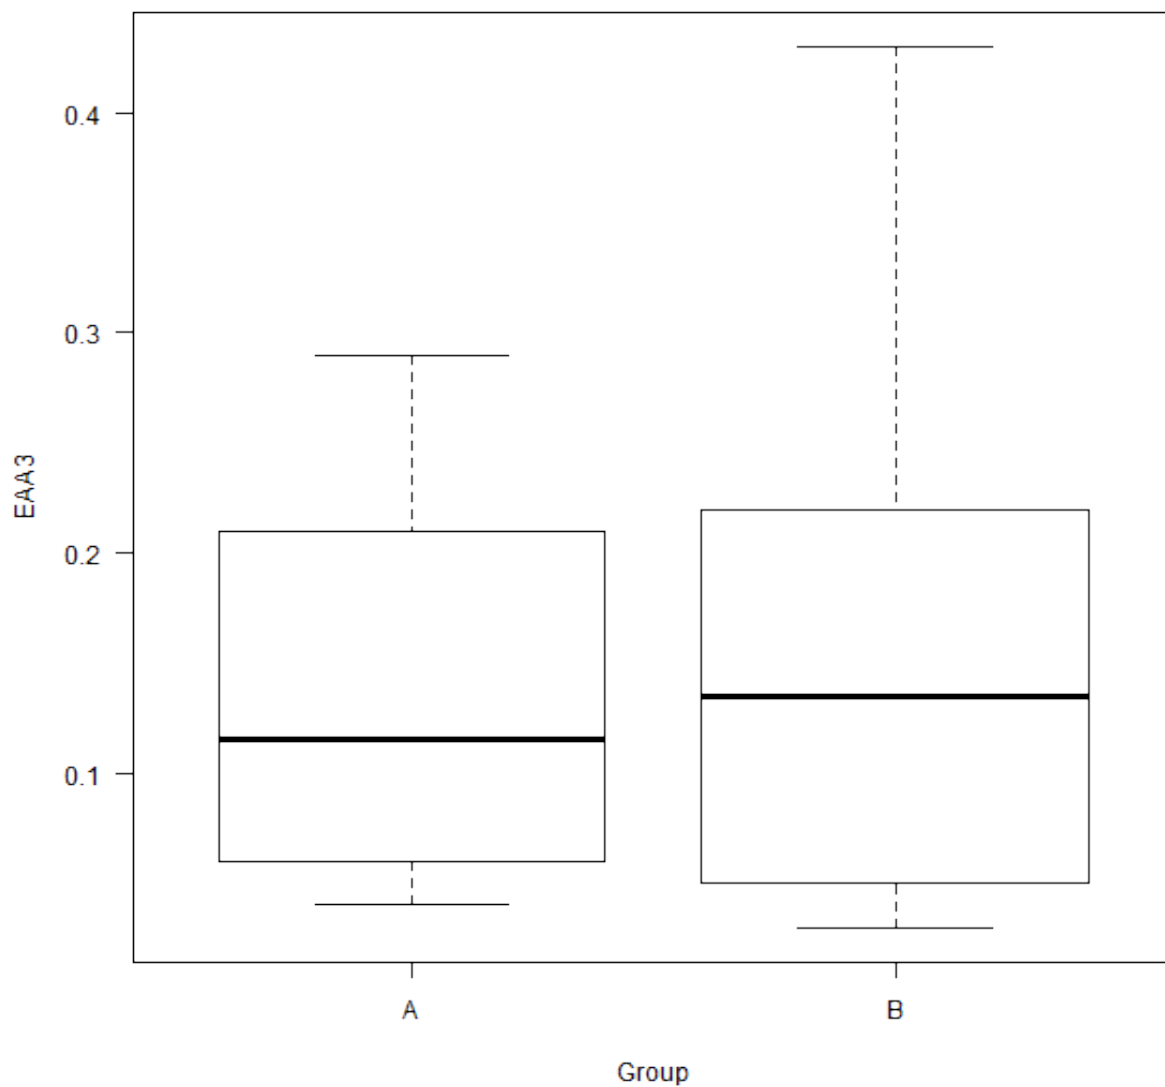

```

> bar.means <- tapply(primary_data$EAA3, factor(primary_data$Group),
+   na.rm=TRUE)
> bar.sds <- tapply(primary_data$EAA3, factor(primary_data$Group), sc
> group.names <- c(group.names, "Group=A")
> group.means <- c(group.means, bar.means[1])
> group.sds <- c(group.sds, bar.sds[1])
> group.p <- c(group.p, signif(res$p.value,digits=3))
> group.names <- c(group.names, "Group=B")
> group.means <- c(group.means, bar.means[2])
> group.sds <- c(group.sds, bar.sds[2])
> group.p <- c(group.p, "")
> summary.ttest <- NULL
> summary.ttest <- data.frame(mean=group.means, sd=group.sds, p.value
> rownames(summary.ttest) <- group.names
> colnames(summary.ttest) <- gettextRcmdr(colnames(summary.ttest))
> summary.ttest

```

|         | mean      | sd         | p.value |
|---------|-----------|------------|---------|
| Group=A | 0.1371429 | 0.08800599 | 0.59    |
| Group=B | 0.1600000 | 0.12955545 |         |
